1 **Optogenetics in *Sinorhizobium meliloti* enables spatial control of exopolysaccharide**  
2 **production and biofilm structure**

3

4 Azady Pirhanov<sup>1</sup>, Charles M. Bridges<sup>2</sup>, Reed A. Goodwin<sup>2#</sup>, Yi-Syuan Guo<sup>3</sup>, Jessica Furrer<sup>4</sup>,  
5 Leslie M. Shor<sup>3,5</sup>, Daniel J. Gage<sup>2</sup>, Yong Ku Cho<sup>1,3,5,6\*</sup>

6 ORCID numbers:

7 Charles M. Bridges: <https://orcid.org/0000-0002-9527-2476>

8 Reed A. Goodwin: <https://orcid.org/0000-0002-6571-8588>

9 Daniel J. Gage: <https://orcid.org/0000-0002-3207-7163>

10 Yong Ku Cho: <https://orcid.org/0000-0001-5621-521X>

11

12 <sup>1</sup>Department of Biomedical Engineering, University of Connecticut, Storrs CT, USA

13 <sup>2</sup>Department of Molecular and Cellular Biology, University of Connecticut, Storrs CT, USA

14 <sup>3</sup>Department of Chemical and Biomolecular Engineering, University of Connecticut, Storrs CT,  
15 USA

16 <sup>4</sup>Department of Computer Science, Physics, and Engineering, Benedict College, Columbia, SC,  
17 USA

18 <sup>5</sup>Center for Environmental Sciences and Engineering, University of Connecticut, Storrs CT, USA

19 <sup>6</sup>Institute for Systems Genomics, University of Connecticut, Storrs CT, USA

20

21 \*Correspondence should be addressed to: Yong Ku Cho: Department of Chemical and  
22 Biomolecular Engineering, University of Connecticut, Storrs CT 06269; cho@uconn.edu; Tel.  
23 (860) 486-4072; Fax. (860) 486-2959.

24 #Current affiliation: Exopolymer, Inc. San Carlos, CA, USA

25

26 **Keywords:** soil bacteria, exopolysaccharide, synthetic biology, optogenetics, biofilm

27 **Abstract**

28           Microorganisms play a vital role in shaping the soil environment and enhancing plant  
29 growth by interacting with plant root systems. Due to the vast diversity of cell types involved,  
30 combined with dynamic and spatial heterogeneity, identifying the causal contribution of a defined  
31 factor, such as a microbial exopolysaccharide (EPS), remains elusive. Synthetic approaches that  
32 enable orthogonal control of microbial pathways are a promising means to dissect such  
33 complexity. Here we report the implementation of a synthetic, light-activated, transcriptional  
34 control platform in the nitrogen fixing soil bacterium *Sinorhizobium meliloti*. By fine tuning the  
35 system, we successfully achieved optical control of an EPS production pathway without significant  
36 basal expression under non-inducing (dark) conditions. Optical control of EPS recapitulated  
37 important behaviors such as a mucoid plate phenotype and formation of structured biofilms,  
38 enabling spatial control of biofilm structures in *S. meliloti*. The successful implementation of  
39 optically controlled gene expression in *S. meliloti* enables systematic investigation of how  
40 genotype and microenvironmental factors together shape phenotype *in situ*.

41

## 42 **Significance**

43           Microorganisms are key players in sustaining the soil environment and plant growth.  
44   Symbiotic associations of soil microbes and plants provide a major source of nitrogen in  
45   agricultural systems, prevent water contamination from synthetic fertilizer application, and support  
46   crop growth in marginal soils. However, measuring the impact of microbial gene products on  
47   beneficial function remains a major challenge. This work provides a critical step toward  
48   addressing this challenge by implementing external gene regulation in a well characterized  
49   nitrogen fixing soil bacterium. We show that light exposure enables spatial and temporal control  
50   of the extracellular polysaccharide production functionality essential for symbiosis. Remote  
51   control of genes enables the benefits of candidate microorganisms to be systematically measured  
52   and enhanced within complex natural settings.

53

54

55

## 56 **Introduction**

57         The soil bacterium *S. meliloti* is a Gram-negative  $\alpha$ -proteobacterium capable of fixing  
58 atmospheric nitrogen during a symbiotic association with certain host plants such as alfalfa  
59 (*Medicago sativa*). Rhizobial nitrogen fixation through symbiotic associations with crop legumes  
60 such as soybean, oilseed legumes, chickpea, and common beans is the most important source  
61 of natural fixed nitrogen in agricultural systems (1, 2). This symbiosis contributes significantly to  
62 sustainable agriculture by reducing water contamination from nitrogenous fertilizers (3) and  
63 supports crop growth in marginal soils of arid regions (3, 4). *S. meliloti* is one of the most  
64 thoroughly studied rhizobia, with complete genome sequences analyzed for multiple isolates (5-  
65 8), including their megaplasmids that carry genes of critical physiological and symbiotic  
66 importance (9). *S. meliloti* is related to plant pathogens such as *Agrobacterium* and animal  
67 pathogens such as *Brucella*. *S. meliloti* and its pathogenic relatives are important models for  
68 studying host-microbe interactions (8).

69         Exopolysaccharides (EPS) are produced by a wide range of bacteria, and impart many  
70 physiological functions including biofilm structure, nutrient acquisition, environmental stress  
71 resistance, and resistance to antimicrobials (10-12). EPS produced by rhizobia have been  
72 extensively studied due to their essential role in host plant invasion (13-15). Lab strains of *S.*  
73 *meliloti* produce succinoglycan (EPS I) and galactoglucan (EPS II) through coordinated activity of  
74 genes located on the pSymB megaplasmid and the chromosome (9, 16-20). EPS I biosynthesis  
75 involves the *exo/exs* genes, which are organized together in several operons on pSymB.  
76 Mutations within a number of these genes result in complete abolition of EPS I production (18,  
77 19, 21, 22). EPS II biosynthesis requires the *exp* gene cluster, which is organized into five putative  
78 transcriptional units, among which *wga* (*expA*), *wgcA* (*expC*), *wgd* (*expD*) and *wge* (*expE*) contain  
79 structural genes that are needed for the production of EPS II (20, 23-25).

80           The control of EPS synthesis in *S. meliloti* involves multiple regulatory systems (23).  
81   Environmental cues, nutrient availability, osmolarity, and the ionic strength of the surrounding  
82   medium affect the production of EPS in *S. meliloti* (26-34). In particular, low phosphate levels,  
83   commonly encountered in soil, are sensed by the two-component regulatory system PhoR-PhoB,  
84   which stimulates EPS II production (24, 35, 36). EPS II production is also coupled to quorum  
85   sensing and motility via regulatory proteins MucR, ExoR and ExpR (23, 37, 38).

86           EPS production is influenced by environmental factors, yet EPS production also indirectly  
87   influences these same environmental factors by altering the structure and function of rhizosphere  
88   systems. Regarding its nitrogen fixing functionality, EPS biosynthesis is required for invasion of  
89   plant roots to occur (15, 16, 39, 40). In addition, EPS promotes auto-aggregation of planktonic *S.*  
90   *meliloti* cells and the formation of structured biofilms (30, 41). Moreover, recent results suggest  
91   that EPS affects how cells interact with the soil particle surfaces and affects water retention and  
92   resiliency in soil, as shown with emulated soil micromodels (42-44). The ability to spatially and  
93   temporally control EPS biosynthesis apart from its multitude of endogenous regulatory pathways  
94   is a powerful new tool to assess not only the causal role of EPS in these and other processes but  
95   in general to decode how genotype gives rise to phenotype *in situ*.

96           Here we report an implementation of an orthogonal, synthetic gene expression system in  
97   *S. meliloti* for controlling EPS II biosynthesis. We show that the blue-light activated transcription  
98   factor EL222 from *Erythrobacter litoralis* HTCC2594 is functional in *S. meliloti* and can be used to  
99   regulate gene expression. Characterization of synthetic ribosome binding sites and alternative  
100   stop codons enabled engineering of an optically controlled expression platform with minimal  
101   expression in the absence of blue light. By optically controlling expression of EPS II biosynthesis  
102   genes we demonstrated spatial control of structured biofilm formation. The successful  
103   implementation of an optically controlled gene expression system in *S. meliloti* opens the door to  
104   testing the function of EPS genes, and as well as many others, *in situ*.

105

106 **Methods**

107 **Growth conditions**

108 *E. coli* strain TOP10 (Invitrogen) was grown in LB medium or on LB plates at 37 °C for plasmid  
109 preparation. Antibiotics were used for *E. coli* cultures at the following concentrations ( $\mu\text{g mL}^{-1}$ ):  
110 tetracycline, 10; gentamycin, 15. *S. meliloti* was grown in, TY medium (6 g of tryptone, 3 g of  
111 yeast extract, and 0.38 g of  $\text{CaCl}_2$  per liter), M9 medium (5.8 g  $\text{Na}_2\text{HPO}_4$ , 3 g  $\text{KH}_2\text{PO}_4$ , 0.5 g NaCl,  
112 1 g  $\text{NH}_4\text{Cl}$ , 0.5 mg biotin, 0.011 g  $\text{CaCl}_2$ , 0.12 g  $\text{MgSO}_4$ , 4 g glucose per liter), or Rhizobium  
113 Defined Medium (RDM) (0.6 g  $\text{KNO}_3$ , 0.1 g  $\text{CaCl}_2 \cdot 2\text{H}_2\text{O}$ , 0.25 g  $\text{MgSO}_4 \cdot 7\text{H}_2\text{O}$ , 0.01 g  $\text{FeCl}_3 \cdot 6\text{H}_2\text{O}$ ,  
114 0.5 mg biotin, 0.01 g thiamine, 20 g sucrose, 1 gram each of  $\text{K}_2\text{HPO}_4$  and  $\text{KH}_2\text{PO}_4$  per liter). For  
115 low-phosphate RDM, 1:1 mass ratio of  $\text{K}_2\text{HPO}_4$ : $\text{KH}_2\text{PO}_4$  was used at a final total concentration of  
116 0.1 mM and morpholinepropanesulfonic acid (MOPS) was added as a buffer at a final  
117 concentration of 0.01 g  $\text{mL}^{-1}$  and pH of 7.0. Unless otherwise stated, *S. meliloti* cultures were  
118 grown in 5 mL TY at 30 °C shaken at 230 RPM and media were supplemented with antibiotics at  
119 the following concentrations ( $\mu\text{g mL}^{-1}$ ): streptomycin, 500; gentamycin, 30; tetracycline, 5. Dark  
120 cultures were grown in culture tubes wrapped with aluminum foil.

121 Standard electroporation technique was used to transform *S. meliloti* cells (45). Briefly, 50  $\mu\text{L}$  of  
122 electro-competent *S. meliloti* cells were mixed with 1.5  $\mu\text{L}$  of DNA (~50 ng total) in sterile  
123 Eppendorf tubes chilled on ice. Subsequently, cells were transferred to ice chilled 0.1 cm  
124 electrode gap Gene Pulser Cuvettes (Bio-Rad cat #1652089) and an electric pulse of 2.3 kV was  
125 applied using GenePulser XCell (Bio-Rad). 1 mL of SOC medium was added and transformants  
126 were selected on TY plates with the appropriate antibiotics.

127 For making frozen culture stocks, cells were grown for 2 d at 30 °C. Following the incubation,  
128 aliquots of 20% glycerol stock cultures were prepared by mixing equal volume of culture with filter  
129 sterilized 40% glycerol (v/v in water) solution and stored at -80°C. When necessary one vial of

130 stock cell culture was then thawed on ice and 20  $\mu$ L was inoculated in 3 mL of TY medium with  
131 appropriate antibiotics.

132

### 133 **Construction of *S. meliloti* EPS I and EPS II deletion strains**

134 *S. meliloti* strain Rm8530 was used as the parent to construct isogenic, unmarked, mutants with  
135 deletions in genes required for synthesis of EPS I (RG27;  $\Delta$ exoY), EPS II (RG33;  $\Delta$ wgaAB) and a  
136 double mutant unable to make either (RG34;  $\Delta$ exoY $\Delta$ wgaAB). In addition, the RG33 ( $\Delta$ wgaAB)  
137 and the double mutant RG34 ( $\Delta$ exoY $\Delta$ wgaAB) strains were complemented with an integrated  
138 plasmid, pRG73 (*wgaAB*<sup>+</sup>) that expressed the *wgaAB* genes from their native promoter. A detailed  
139 procedure of *S. meliloti* strain construction is described in **Supp. Methods**.

140

### 141 **Plasmid construction**

142 Plasmids and primers used in this study are described in **Table 1** and **Supp. Table 2**. Superfolder  
143 GFP (*sfGFP*) (46) was cloned under  $P_{EI222\_rbsD}$  promoter-ribosome binding site (RBS)  
144 combination in pSEVA531 by using Golden Gate (GG) assembly. The resulting plasmid was  
145 named pAP01. Next, the *EI222* gene driven by BBa\_J23105-rbs34 and BBa\_J23115-rbs34  
146 promoter-RBS combinations were cloned into the pAP01 backbone and the resulting plasmids  
147 were named pAP05 and pAP15 respectively. The *wgaAB* genes were PCR amplified from wild  
148 type *S. meliloti* genomic DNA and a  $P_{EI222\_rbs34\_wgaAB}$  insert was assembled. Subsequently,  
149  $P_{EI222\_rbsD\_sfGFP}$  in pAP05 was swapped with  $P_{EI222\_rbs34\_wgaAB}$  using GG assembly, which  
150 produced plasmid pAP14, where *EI222* expression was driven by the BBa\_J23105-rbs34  
151 promoter-RBS combination. In order to construct plasmids pAP33, pAP34, pAP35, pAP36, pAP37  
152 and pAP38 which have different combinations of ribosome binding site and start codon,  
153 components were engineered with flanking XbaI and NotI sites. Briefly, the pAP05L backbone  
154 (which constitutively expressed *EL222* from *lacI*<sup>q</sup> promoter) was PCR amplified with a reverse

155 primer containing a 5' XbaI site flanking a ribosome binding site (either rbsD, rbs31 or rbs33) and  
156 forward primer containing a NotI restriction site. The *wgaAB* gene was PCR amplified with primers  
157 containing either ATG or GTG as a start codon and with appropriate restriction sites and cloned  
158 into PCR amplified plasmids with different RBS (rbsD, rbs31 or rbs33). Resulting constructs were  
159 named pAP33 through 38.

160

### 161 **Measurement of promoter strength in *S. meliloti***

162 Promoters were tested using a transcriptional fusion to the reporter enzyme  $\beta$ -glucuronidase  
163 (GUS) (47), encoded by *gusA* (see **Supp. Table 1**). The promoter-*gusA* constructs were  
164 generated using overlap extension PCR with primers containing the promoter of interest and *gusA*  
165 overlap sequence (see primers used in **Supp. Table 2**). In all of the constructs, the same  
166 ribosome binding site, BBa\_B0034 (rbs34; parts.igem.org), was used. The resulting constructs  
167 were cloned into plasmid pSEVA531 (48) using Golden Gate (GG) assembly (49) (see list of  
168 resulting plasmids in **Supp. Table 2**). The pSEVA531 plasmid contained the pBBR1 origin of  
169 replication and *tetA* for selection. Freshly made *S. meliloti* RG34/pAP00GUS,  
170 RG34/pAPP<sub>E1222</sub>GUS, RG34/pAP05GUS, RG34/pAP08GUS, RG34/pAP10GUS,  
171 RG34/pAP15GUS, RG34/pAPFixK2GUS, RG34/pAPlacI<sup>q</sup>GUS and RG34/pAPRGUS cells  
172 expressing *gusA* were inoculated into TY medium with tetracycline and grown for 48 h at 30 °C  
173 with 230 RPM shaking. Cells were diluted to an optical density (OD<sub>600</sub>) of 0.1 and grown until  
174 reaching OD<sub>600</sub> 0.5-0.6, measured with a ND-1000 spectrophotometer with pathlength of 1 cm.  
175 Subsequently, cells were either used immediately for the GUS assay or stored at -80 °C in 0.5  
176 mL aliquots. Frozen cells were thawed on ice, diluted to OD<sub>600</sub> 0.3, and 500  $\mu$ L of cell suspension  
177 was permeabilized by adding 30  $\mu$ L 0.1 % SDS (w/v) and 60  $\mu$ L chloroform and vortexing for 10  
178 s. 50  $\mu$ L of permeabilized cell suspension was added to 950  $\mu$ L of GUS assay buffer (50 mM  
179 NaPO<sub>4</sub> pH 7, 5 mM DTT, 1 mM EDTA, 1.25 mM 4-methylumbelliferyl  $\beta$ -D-glucuronide(MUG)) and



180 incubated in a 37 °C water bath for 5 min. The reaction was halted by transferring 100 µL of  
181 sample to 900 µL 0.4 M Na<sub>2</sub>CO<sub>3</sub>. Formation of 4-methylumbelliferone (4-MU) was measured from  
182 100 µL of stopped reaction mixture in cell culture treated optical bottom black polystyrene  
183 microplates (Thermo Scientific, cat #165305) in a plate reader (Biotek HT Synergy) by using  
184 fluorescence at 365/460 nm (excitation/emission). Experiments were carried out in an  
185 environment with minimal light to avoid decomposition of MUG.

186

### 187 **Light controlled sfGFP expression**

188 *S. meliloti* strains RG34/pAP01 and RG34/pAP05 were grown in 5 mL TY medium with  
189 tetracycline selection for 48 hours at 30 °C with 230 RPM shaking without light exposure (culture  
190 tubes were wrapped with aluminum foil). Subsequently cells were diluted 100 fold in 500 µL M9  
191 medium with appropriate antibiotics and grown under static conditions for 48 hours at 30°C a 6-  
192 well plate (Corning cat #3516) illuminated with 6 W/m<sup>2</sup> blue light (Thorlabs 470 nm light-emitting  
193 diode (LED) filtered with a Chroma 480/40 bandpass filter). Due to the high light sensitivity of the  
194 EL222, light intensities well below those used for exciting fluorescent proteins are needed to  
195 induce light-driven transcriptional unit (50, 51). Cells were collected by centrifugation and washed  
196 in fresh M9 once and sfGFP expression levels were measured by flow cytometry using a BD  
197 Biosciences LSRFortessa X-20 Cell Analyzer (FITC channel). Individual signals from 30,000 cells  
198 were collected and data were analyzed by using FlowJo (vX.0.7).

199 For kinetic studies of sfGFP expression, *S. meliloti* strain RG34 with pAP01, pAP05 or pAP15  
200 plasmids were grown in aluminum-wrapped tubes 5 mL TY media for 48 hours with appropriate  
201 antibiotics at 30 °C with 230 RPM shaking. Subsequently, cells were diluted in M9 to an OD<sub>600</sub> of  
202 0.1 and cultured in 24 well plates with 5 W/m<sup>2</sup> blue light illumination at 30 °C without shaking. A  
203 duplicate plate was maintained in the dark. Cells were harvested at each time point and treated

204 with chloramphenicol (100 µg/ml) to stop protein translation and kept at 4°C. Fluorescence levels  
205 were measured by flow cytometry as above.

206

### 207 **Autoaggregation assay**

208 *S. meliloti* RG34/pAP14, RG34/pAP33, RG34/pAP34, RG34/pAP35, RG34/pAP36, RG34/pAP37  
209 and RG34/pAP38 were grown in 5 mL TY with tetracycline selection for 48 hours without any light  
210 exposure at 30 °C with 230 RPM shaking (culture tubes were wrapped with aluminum foil). Culture  
211 optical density was measured ( $OD_{600initial}$ ) then tubes were incubated 24 hours without shaking at  
212 4°C. The  $OD_{600}$  of the upper 0.2 mL of culture media was measured ( $OD_{600final}$ ). The  
213 autoaggregation percentage was calculated as:  $100[1-(OD_{600final}/OD_{600initial})]$ . Great care was taken  
214 not to disturb cultures during 4°C incubation and final optical density measurements.

215

### 216 **Anthrone Assay**

217 To quantify the carbohydrate content in culture supernatants, cultures were transferred to a  
218 conical tube and centrifuged at 4000 RPM (3320 rcf) for 10 min. The supernatant was collected  
219 and kept at 4 °C until use, no longer than 2 days. 0.2 % anthrone was prepared fresh by dissolving  
220 0.1 g of anthrone (CAS: 90-44-8) in 50 mL of 95% sulfuric acid. 50 µL of supernatant was mixed  
221 with 150 µL of 0.2% anthrone in 1.5 mL Eppendorf tubes and incubated at 4°C for 10 min followed  
222 by 100°C for 20 min in an oven. Tubes were allowed to cool to room temperature and the  $A_{620}$  of  
223 the reaction mix was measured with a plate reader. Glucose equivalents were calculated from a  
224 glucose calibration curve.

225

### 226 **Light Controlled EPS II production**

227 *S. meliloti* strains RG34/pAP14, RG34/pAP33, RG34/pAP34, RG34/pAP35, RG34/pAP36,  
228 RG34/pAP37 and RG34/pAP38 were grown in 5 mL TY medium for 48 hours with appropriate

229 antibiotic selection at 30 °C with 230 RPM shaking without light exposure (culture tubes were  
230 wrapped with aluminum foil). Cells were diluted 100-fold in fresh TY medium with appropriate  
231 antibiotics and continuously exposed to 6 W/m<sup>2</sup> blue light for 48 hours at 30°C. Duplicate control  
232 cultures were grown under the same conditions in the dark. Following growth, EPSII production  
233 was measured using the anthrone assay.

234

### 235 **Duty Cycle Experiments**

236 Cells from 20 % glycerol stocks were grown in 5 mL TY media for 48 hours with appropriate  
237 antibiotic selection at 30 °C, with 230 RPM shaking, without light exposure (culture tubes were  
238 wrapped with aluminum foil). The cells were diluted to an OD<sub>600</sub> of 0.1 in RDM media with  
239 antibiotics and cultured in 500 µL volume in cell culture treated 24 well polystyrene plates. Plates  
240 were illuminated from bottom with blue light at 2 W/m<sup>2</sup> intensity with illumination programs  
241 described in the text for approximately 44 hours at 28 °C without shaking. A duplicate plate  
242 incubated in the absence of light was used as a control. An Arduino microprocessor was  
243 programmed accordingly for each duty cycle experiment.

244

### 245 **Confocal Microscopy**

246 Cells from 20 % glycerol stock were inoculated in 5 mL TY media and grown for 48 h with  
247 appropriate antibiotics at 30 °C with 230 RPM shaking without light exposure (culture tubes were  
248 wrapped with aluminum foil). Cells were diluted to OD<sub>600</sub> of 0.1 in RDM medium and 500 µL were  
249 cultured in 8-chamber glass slides (Lab-Tek II) for approximately 48 h at 28 °C. Samples were  
250 either illuminated with 1 W/m<sup>2</sup> blue light (Thorlabs 470 nm LED filtered with a Chroma 480/40  
251 bandpass filter) or kept in the dark throughout the incubation. Slides were imaged with a Nikon  
252 A1R inverted confocal microscope (488 nm excitation, 525/50 nm emission) with a 20x/0.45 S

253 Plan Flour ELWD objective. Step size of 2.175  $\mu\text{m}$  was used to generate Z-stack images. NIS-  
254 Elements software was used to operate the instrument and capture the images.

255

### 256 **Computation of biofilm properties from confocal microscopy data**

257 COMSTAT 2.1 (Release date July 1, 2015) was used to assess biofilm morphology according to  
258 the provider's instruction (52, 53). **Nd2** image files were converted to **ome.tiff** files using the  
259 ImageJ Bio-Formats plugin. The ImageJ Comstat2 plugin was used to analyze image files in  
260 terms of *BioMass* ( $\mu\text{m}^3/\mu\text{m}^2$ ), *Thickness Distribution* ( $\mu\text{m}$ ), and *Surface Area* ( $\mu\text{m}^2$ ). During the  
261 calculations *Connected Volume Filtering* was selected to eliminate contributions from non-  
262 continuous layers of biofilm, as they can be freely floating and not be associated with structured  
263 biofilms that formed on the bottom of the glass chamber.

264

### 265 **Patterning structured biofilm formation**

266 Cells from 20 % glycerol stock were inoculated in 5 mL TY medium and grown for 48 h with  
267 appropriate antibiotics at 30 °C, with 230 RPM shaking, without light exposure (culture tubes were  
268 wrapped with aluminum foil). Then cells were diluted to  $\text{OD}_{600}$  of 0.1 in RDM medium with  
269 appropriate antibiotics and cultured in 500  $\mu\text{L}$  cell culture in a treated 24 well polystyrene plate  
270 illuminated with 1  $\text{W}/\text{m}^2$  blue light for approximately 44 h at 28 °C without shaking. Half of each  
271 well was covered with electric tape and the other half was left open to illumination. After  
272 approximately 48 h a small area of the well covering both illuminated and un-illuminated regions  
273 was scanned with a fully motorized fluorescence microscope capable of imaging large samples  
274 (Keyence BZ-X800/BZ-X810). The individual captured images were reconstituted into a single  
275 large image using the manufacturer's software.

276

### 277 **Results and Discussion**

278 **Synthetic constructs for light-driven gene expression in *S. meliloti*.**

279 To enable spatial and temporal control of EPS production, we sought to implement light-  
280 activated gene expression in *S. meliloti* strain Rm8530 (16). Light-sensitive photoreceptor  
281 domains have been reported in *Rhizobium leguminosarum* (54, 55) and *Bradyrhizobium* (55), but  
282 not in *Sinorhizobium* (55). A BLAST search of the *S. meliloti* genome did not yield any genes  
283 encoding light oxygen voltage (LOV) domains, so we sought other means to control EPS  
284 production with light (**Supp. Table 3**). The LOV domain containing protein EL222 (56), from the  
285 gram-negative bacterium *E. litoralis* HTCC2594, is a blue-light sensing protein with a C-terminal  
286 helix-turn-helix (HTH) DNA-binding domain representative of LuxR-type transcriptional regulator  
287 (57). EL222 has been developed as a light modulated transcriptional regulator in *E. coli* (51).  
288 EL222 can act as either an activator or repressor depending whether its binding site is located  
289 upstream (activator) of, or within (repressor) a promoter sequence. Based on this information, we  
290 constructed a blue-light inducible gene expression system in *S. meliloti* strain Rm8530 (**Fig. 1a**).  
291 In order to generate a single-plasmid enabling light-triggered gene expression, a constitutive  
292 promoter driving expression of *EL222* was desired. We tested the activity of a number of well-  
293 characterized promoters (**Supp. Table 1**) by driving the expression of the reporter enzyme  $\beta$ -  
294 glucuronidase (GUS)(47) in *S. meliloti*. Robust GUS activity was detected from promoters  
295 BBa\_J23100 and pR (**Supp. Fig. 3**). Promoters BBa\_J233105, and pLacI<sup>q</sup> drove moderate levels  
296 of expression, while BBa\_J233108, BBa\_J233110, and BBa\_J233115 led to weak expression  
297 (**Supp. Fig. 3**). To assess light-activated gene expression in *S. meliloti*, we constructed a plasmid  
298 (pAP05, **Fig. 1b**), using the pSEVA531 backbone (58), which contained the pBBR1 origin of  
299 replication and *tetA* for selection. In pAP05, an EL222-binding promoter ( $P_{EL222}$ , **Supp. Table 1**)  
300 regulates the expression of superfolder GFP (sfGFP), while EL222 is constitutively expressed  
301 from the moderate-strength promoter BBa\_J23105 (**Fig. 1b, Supp. Fig. 3**). The EPS<sup>I/II</sup> *S.*  
302 *meliloti* strain RG34, which makes no EPS, was transformed with pAP05, and showed a 5.4-fold

303 induction of GFP fluorescence after 48 hrs of blue-light illumination (**Fig. 1c**). Compared to the  
304 untransformed *S. meliloti* strain RG34, RG34/pAP05 showed a small (20-fold), but significant,  
305 leaky sfGFP expression under dark conditions (**Fig. 1c**,  $P = 0.0063$ , unpaired two-tailed t-test  
306 comparing RG34 vs. RG34/pAP05 dark). Similar levels of sfGFP fluorescence were detected  
307 either under light or dark conditions, in strain RG34/pAP01 which lacked the EL222 gene  
308 contained in pAP05 (**Fig. 1c**,  $P = 0.034$ , unpaired two-tailed t-test comparing RG34 vs.  
309 RG34/pAP01), suggesting that the leaky expression originated from low levels of transcription  
310 from  $P_{EL222}$ . Interestingly, this leaky expression driven by  $P_{EL222}$  was not detected in GUS assays  
311 (**Supp. Fig. 3**,  $P_{EL222}$ ), possibly due to the high intracellular stability of sfGFP (59). To assess if  
312 the light intensity used for activating EL222 affected the growth of *S. meliloti* RG34/pAP11GFP,  
313 we obtained growth curves with and without light stimulation (**Supp. Fig. 4**). Strain RG34  
314 harboring pAP11GFP, which constitutively expresses sfGFP (**Supp. Table 2**), showed no  
315 difference in cell growth with and without blue light stimulation over 48 hrs (**Supp. Fig. 4**). We  
316 then characterized the time response of light-driven gene expression by measuring sfGFP  
317 fluorescence in *S. meliloti*. Strain RG34/pAP05 showed low sfGFP expression after 8 hours of  
318 illumination and a 4-fold induction after 24 h (**Fig. 1d**).

319

## 320 **Optogenetic control of EPS production.**

321 To enable optical control of EPS II production, we sought to control the expression of  
322 *wgaAB* using the EL222 system in strain RG34. We determined the start codon of *wgaAB* based  
323 on a previous study that identified the gene cluster involved in EPS production and predicted the  
324 start codons of those genes (17). We assessed the potential leakiness of  $P_{EL222}$  when driving  
325 transcription of genes needed for EPS II synthesis as well its ability to activate light-driven EPS  
326 production by replacing *sfGFP* in pAP05 with the *wgaAB* genes (**Supp. Table 2, Fig. 2a**). Since  
327 we knew that a low, but significant, amount of leaky expression occurred when  $P_{EL222}$  drove  
328 *sfGFP*, we generated variants with different start codons (GTG and ATG) and inserted alternative

329 RBSs in front of the *wgaAB* genes (**Fig. 2b**). To quantify EPS production, we used two previously  
330 developed assays (41, 60). First, we applied a sedimentation assay, which relies on aggregation  
331 of EPS-producing cells in planktonic culture (41). The sedimentation assay was effective in  
332 detecting leaky expression under dark conditions. We observed significantly higher sedimentation  
333 in strain RG34 transformed with plasmids pAP34, pAP35, pAP37, and pAP38, compared to the  
334 EPS deficient RG34 control cells (**Fig. 2c**), indicating that these plasmids had leaky production of  
335 EPS under dark conditions. The degree of sedimentation (as quantified by the sedimentation  
336 coefficient) showed a nearly binary response, where leaky constructs showed nearly complete  
337 sedimentation under dark conditions (RG34/pAP34, RG34/pAP35, RG34/pAP37, and  
338 RG34/pAP38), while sedimentation of RG34/pAP14, RG34/pAP33, and RG34/pAP36 was  
339 comparable to that of the EPS I and II-deficient parental strain RG34 (**Fig. 2c**). To compare the  
340 light-driven EPS production in strains that did not show significant leaky EPS production (RG34  
341 with pAP14, pAP33, or pAP36), we measured the sugar concentration in culture supernatants  
342 using the anthrone assay (60). In this assay, significantly larger amounts of sugars were detected  
343 in strain RG27 (EPS I<sup>-</sup>, EPS II<sup>+</sup>) compared to the strain RG34 (EPS I<sup>-</sup>, EPS II<sup>-</sup>) (**Fig. 2d**,  $P = 0.0044$ ).  
344 Strain RG34/pAP14 exhibited a significant increase in culture carbohydrates upon blue light  
345 illumination (**Fig. 2d**,  $P = 0.037$ ), indicating light-driven EPS production, while RG34/pAP33 and  
346 RG34/pAP36 did not show a significant increase (**Fig. 2d**,  $P = 0.26$ ,  $P = 0.17$ , respectively). Strain  
347 RG34/pAP14 cells under dark conditions did not show a significant difference in sugar content  
348 compared to that of the EPS deficient RG34 cells (**Fig. 2d**,  $P = 0.36$ ), indicating a lack of leaky  
349 EPS production. However, the amount of polysaccharide secreted by RG34/pAP14 cells under  
350 light was ~67% of that made by strain RG27 indicating modest EPS production recovery (**Fig.**  
351 **2d**). Therefore, changing the start codon and the RBS of *wgaAB* did impact the ability to control  
352 EPS production, and as a result identified plasmid pAP14 ( $P_{EL222\_rbs34\_ATG\_wgaAB}$ ) as having  
353 the best overall performance among those tested.

354

355 **Optogenetic control of mucoid phenotype and structured biofilm formation.**

356 As we expected, on solid media strain RG34/pAP14 showed a mucoid phenotype under  
357 blue-light illumination, but not under dark conditions, while strain RG34 exhibited a dry phenotype  
358 under both conditions (**Fig. 3a**). Another key characteristic of EPS-producing *S. meliloti* is the  
359 formation of three-dimensionally structured biofilms (30, 61). Previous studies have shown that  
360 EPS II is essential for biofilm formation and autoaggregation in *S. meliloti* (30, 41). Therefore, we  
361 assessed biofilm formation by the light-controlled production of EPS II. To visualize cells using  
362 fluorescence microscopy, we transformed a plasmid containing *sfGFP* under a constitutive  
363 promoter (pAP11GFP) into *S. meliloti* strains RG34 (EPS I<sup>-</sup>, EPS II<sup>-</sup>) and RG27 (EPS I<sup>-</sup>, EPS II<sup>+</sup>).  
364 The EPS II-producing strain RG27/pAP11GFP showed spatially heterogeneous biofilm formation,  
365 while strain RG34/pAP11GFP formed a uniform layer of cells (**Fig. 3b, Supp. Movies 1, 2**),  
366 consistent with previous observations (30). Strain RG34/pAP14+pAP11GFP showed similar  
367 spatial organization to the positive control strain RG27/pAP11GFP upon light activation (**Fig. 3b,**  
368 **Supp. Movie 3**). These results indicated successful light-driven control of EPS production in *S.*  
369 *meliloti* to an extent that allowed the formation of structured biofilms.

370 Previous biophysical characterizations of the EL222 dynamics showed that the structural  
371 changes in EL222 upon light activation were spontaneously reversed in dark with a decay time  
372 constant ( $\tau$ ) of 11 s at 37 °C (62). Consequently, transcriptional activity regulated by EL222 had a  
373 deactivation time constant of around 50 s (63). Based on these observations, we hypothesized  
374 that EPS II production and biofilm formation by *S. meliloti* could be controlled with pulses of blue  
375 light followed by dark periods, instead of continuous illumination. Although we have not observed  
376 blue-light mediated growth inhibition in *S. meliloti* at the light intensities used for activation of  
377 EL222, prolonged illumination may hinder long-term experiments due to phototoxic effects.  
378 Starting from continuous illumination (100% duty cycle), we reduced the duty cycle of illumination  
379 to 5% (3 s illumination followed by 57 s dark). Even with a 5% duty cycle, strain  
380 RG34/pAP14+pAP11GFP formed structured biofilms (**Fig. 4a**) that showed the same structured



381 organization as biofilms made by strain RG27/ pAP11GFP producing EPS II (**Fig. 4b**). To quantify  
382 the structural organization, we measured the peak heights of the fluorescence profiles. Under  
383 dark conditions strain RG34/pAP14 + pAP11GFP showed low peak heights comparable to that  
384 of the EPS deficient RG34/pAP11GFP cells. The EPS II producing strains RG27/pAP11GFP and  
385 RG34/pAP14+pAP11GFP exposed to a 5% duty cycle of illumination showed significantly higher  
386 peak heights values compared to that of RG34/ pAP11GFP cells (**Fig. 4c**). These results  
387 suggested that short pulses of light with 5% duty cycle generated structured biofilms.

388

### 389 **Biofilm structure, thickness, and spatial control.**

390 Optical activation is highly suitable for *in situ* control of biological processes in complex  
391 environments. For example, optical control of EPS II production would allow spatial and temporal  
392 control of structured biofilm formation, which may enable testing the causal role of EPS II in the  
393 interaction between plant root nodulation and bacterial invasion (64-66). Using confocal  
394 microscopy, we characterized the thickness of biofilms and biomass formed by optically-controlled  
395 EPS II-producing *S. meliloti* using COMSTAT2 (52, 53). In order to assess the effect of light-  
396 driven activation of *wgaAB* on biofilm formation, we tested strain RG34/pAP14+pAP11GFP and  
397 control strain RG34/pAP05EL222+pAP11GFP. The latter strain lacked light-driven *wgaAB* genes  
398 and expressed EL222 constitutively. Notably, this control strain isogenic to the test strain,  
399 allowing the assessment of spurious activation of other genes by EL222, or by blue light alone,  
400 that may impact biofilm formation. After culturing RG34/pAP14+pAP11GFP and  
401 RG34/pAP05EL222+pAP11GFP for 2 days with and without blue light illumination, we observed  
402 cell clustering consistent with structured biofilm formation only in RG34/pAP14+pAP11GFP under  
403 blue light and high phosphate conditions (13 mM, **Fig. 5a**). Under low phosphate conditions (0.1  
404 mM), which typically induce EPS II production, the structures within biofilm were not as clearly  
405 visible (**Fig. 5a**), perhaps due to overgrowth. Indeed, the low phosphate condition resulted in  
406 approximately 2-fold increase in biofilm thickness and biomass in all samples regardless of light

407 exposure (**Fig. 5b, c**). Light activation induced a small, but significant increase in biofilm thickness  
408 (under both high and low phosphate conditions) and biomass (under high phosphate conditions)  
409 in RG34/pAP14+pAP11GFP but not in RG34/pAP05EL222+pAP11GFP cells (**Fig. 5b, c**). These  
410 results show that optical control of *wgaAB* expression resulted in biofilm properties consistent with  
411 previous studies using mutants that did or did not make EPS (30). Finally, we tested spatial  
412 control of structured biofilm formation by optically activating EPS production in defined regions of  
413 a sample. The EPS II inducible strain RG34/pAP14+pAP11GFP showed distinct structured  
414 biofilm formation only in illuminated regions, while the RG34/pAP05EL222+pAP11GFP control  
415 cells showed no difference in biofilm morphology in illuminated and dark regions (**Fig. 5d**). The  
416 transition from structured to non-structured regions occurred over approximately 400  $\mu\text{m}$  (**Fig.**  
417 **5d**), reflecting possible light scattering from the light region into the dark region, the diffuse nature  
418 of secreted EPS II and motility of *S. meliloti* cells during biofilm formation. Taken together, these  
419 experiments demonstrated spatial control of EPS II production and accompanying biofilm  
420 structure in *S. meliloti*.

421

## 422 **Conclusions**

423 We have successfully implemented light-driven transcription in *S. meliloti* using the EL222 protein  
424 from *E. litoralis* and applied it to controlling the biosynthesis of EPS II. Optical control of EPS II  
425 synthesis was achieved by placing *wgaAB*, two genes required for its synthesis, under  
426 transcriptional control by EL222. Optical activation of EPS II production enabled spatial control  
427 of biofilm formation in *S. meliloti*, modifying biofilm thickness, biomass, and structure. EPS II  
428 biosynthesis was tightly controlled under dark conditions, and further refinement may enhance  
429 EPS II production upon light induction. The optical control approach shown here could be  
430 implemented for orthogonal gene expression control in *S. meliloti* when spatial and temporal  
431 regulation is desired. In particular, this approach can be easily implemented in recently developed  
432 experimental setups that allow optical access to plant root systems, soil, and bacteria (67, 68).

433 We anticipate that the tools developed here will lead to new insights on the role of EPS and other  
434 products in *S. meliloti* and related bacteria.

435

#### 436 **Acknowledgements**

437 This work was funded by the DOE grant DE-SC0014522. The authors have no conflicts of interest  
438 with the contents of this article.

439

440 **Figure legends**

441  
442 **Figure 1.** Light-driven gene expression in *S. meliloti*. **(a)** Schematic representation of blue light-  
443 driven transcription by EL222. EL222 consists of a N-terminal LOV domain (blue) connected to a  
444 C-terminal HTH DNA binding domain (grey) via a  $\alpha$  helix (not shown). In the dark, EL222 is  
445 predominantly monomeric and unable to bind to DNA; however exposure to blue light shifts the  
446 equilibrium toward dimers, enhancing binding to the  $P_{EL222}$  promoter and transcription. **(b)**  
447 Schematic representation of plasmid pAP05 enabling blue light-driven expression of sfGFP.  
448 EL222 was expressed from the constitutive promoter BBa\_J23105 and sfGFP from the  $P_{EL222}$   
449 promoter. The plasmid backbone is based on pSEVA531. **(c)** Quantification of blue light-driven  
450 sfGFP expression in *S. meliloti* strains RG34, RG34/pAP01, and RG34/pAP05. As a control,  
451 RG34 was transformed with pAP01, which is identical to pAP05 except it is missing EL222. Cells  
452 were illuminated with blue light ( $6\text{ W/m}^2$ ) for 48 hours. Fluorescence intensities were then  
453 measured using flow cytometry. Statistics: \*,  $P < 0.05$ ; \*\*,  $P < 0.01$ , unpaired two tailed t-test. **(d)**  
454 Time course of GFP levels of untransformed strains RG34, RG34 transformed with pAP01, pAP05  
455 or pAP15. pAP15 is similar to pAP05 except EL222 expression is driven from weaker constitutive  
456 promoter (Supp. Fig1. and Supp. Table 3). Cells were illuminated with blue light (solid line,  $6$   
457  $\text{W/m}^2$ ) or kept in dark (dashed line). Data plotted are mean  $\pm$  standard deviation ( $n = 3$   
458 independently prepared samples).

459  
460 **Figure 2.** Quantitative assessment of light-driven EPS production in *S. meliloti*. **(a)** Parts of pAP14  
461 for light-driven expression of *wgaAB*. The plasmid was constructed by replacing the *sfGFP* from  
462 pAP05 with *wgaAB*. The start codon of *wgaA* is shown in bold. **(b)** Plasmids generated to improve  
463 light-induced production of EPS. Plasmids that use an alternative start codon (GTG) as well as  
464 various ribosome binding sites (yellow sequence in (a)) are shown. The resulting plasmids were  
465 transformed into strain RG34 and assessed for light-induced production of EPS using the cell  
466 sedimentation assay. The 'light responsiveness' column summarizes the results; 'inducible'  
467 indicates increased EPS production upon light stimulation, uninducible indicates no increase upon  
468 light activation, and 'leaky' indicates EPS production under dark conditions as inferred from the  
469 results in panel (c). **(c)** Sedimentation of planktonic *S. meliloti* cells in TY medium under dark  
470 conditions. **(d)** Measurement of secreted polysaccharide content using an anthrone assay. Free  
471 saccharide concentration was determined using glucose solutions as a standard. Plasmids  
472 pAP14, pAP33, and pAP36, which did not show leakiness in the sedimentation assay, were  
473 transformed in strain RG34, and tested for light-driven EPS production. Shaded bar graphs  
474 indicate samples kept in dark, while open bar graphs indicate samples continuously illuminated  
475 ( $470\text{ nm LED}$ ,  $6\text{ W/m}^2$ ). Plotted in panels (c) and (d) are mean  $\pm$  standard deviation of data from  
476 three independent culture preparations. Statistics for panels (c): \*\*\*\*:  $P < 0.0001$  from ANOVA  
477 with Dunnett's multiple comparisons test comparing the sedimentation coefficient of samples to  
478 that of strain RG34, (d): \*:  $P < 0.05$ , \*\*:  $P < 0.01$ , ns:  $P > 0.05$  from unpaired t-test.

479  
480 **Figure 3.** Optogenetic control of mucoid phenotype and biofilm structure in *S. meliloti*. **(a)**  
481 Assessment of EPS production on agar plates. Strains RG34 and RG34/pAP14 were grown on  
482 TY agar plates either under dark or with continuous illumination of blue light ( $470\text{ nm LED}$ ,  $6$   
483  $\text{W/m}^2$ ) for 2 days. **(b)** Observation of biofilm structures by fluorescence microscopy. Strains  
484 RG34/pAP11GFP and RG27/pAP11GFP. Strains RG34/pAP14+pAP11GFP grown under dark  
485 conditions or with continuous illumination of blue light ( $470\text{ nm LED}$ ,  $6\text{ W/m}^2$ ). Fluorescence from  
486 sfGFP was imaged after 40 hrs. Scale bars in panel (b) indicate  $20\ \mu\text{m}$ . Grayscale images  
487 indicate sfGFP fluorescence and the pseudo-colored images are Gaussian filtered (ImageJ)  
488 images that enhance differences between biofilm structures. Time-lapse movies of these samples

489 over 40 hrs are in **Supp. Movies 1-3** (Movies of RG34/pAP11GFP, RG27/pAP11GFP,  
490 RG34/pAP14+pAP11GFP, respectively).  
491

492 **Figure 4.** Structured biofilm formation with reduced illumination duty cycle. **(a)** Fluorescence  
493 images of biofilms under varying duty cycles. Duty cycles were calculated by the fraction of time  
494 cells were illuminated within each minute. 5% duty cycle indicates 3 s of light (L) followed by 57 s  
495 of dark (D). All cells were illuminated for a total duration of 48 hrs. Scale bars indicate 20  $\mu\text{m}$ . **(b)**  
496 Fluorescence profiles quantified from images in panel (d). **(c)** Normalized peak heights quantified  
497 from fluorescence profiles. Data plotted are mean  $\pm$  standard deviation of peaks quantified from  
498  $n = 2-3$  independently prepared samples. Statistics: \*\*,  $P < 0.01$ ; \*\*\*\*,  $P < 0.0001$ , Dunnett's  
499 multiple comparisons test.  
500

501 **Figure 5.** Spatial control of biofilm structure, thickness, and biomass in *S. meliloti*. **(a)** Confocal  
502 fluorescence images of light controllable biofilms formed under high- and low-phosphate  
503 conditions. Strains RG34/pAP14+pAP11GFP and RG34/pAP05EL222+pAP11GFP were grown  
504 in high or low phosphate RDM medium with or without light for 48 hours (470 LED 1 W/m<sup>2</sup>). The  
505 strain RG34/pAP05EL222+pAP11GFP (expressing EL222 only) was used as a negative control.  
506 Scale bars indicate 100  $\mu\text{m}$ . **(b)** Biofilm thickness and biomass estimates, as measured by  
507 COMSTAT2, of biofilms shown in (a) **(c)** Spatial control of structured biofilm formation.  
508 RG34/pAP14+pAP11GFP and RG34/pAP05EL222+pAP11GFP were grown in high phosphate  
509 RDM for 44 hours. Black electrical tape was used to block light exposure of half of the 24 well  
510 plate (470 LED 1 W/m<sup>2</sup>). A region of the well covering both illuminated (light) and non-illuminated  
511 (dark) region of the plate was scanned. A fluorescence intensity profile of the region is shown.  
512 Scale bars in (d) indicate 500  $\mu\text{m}$  (top panels) and 50  $\mu\text{m}$  (bottom-right panels). Statistics for panel  
513 (b): \*,  $P < 0.05$ , unpaired two tailed t-test.  
514  
515

516 **Table 1.** Strains and plasmids used in this work

| Strain or Plasmid          | Characteristic                                                                                                                             | Reference |
|----------------------------|--------------------------------------------------------------------------------------------------------------------------------------------|-----------|
| <i>S. meliloti</i> strains |                                                                                                                                            |           |
| Rm1021                     | SU47 str-21 <i>expR102::ISRm2011-1</i>                                                                                                     | (69)      |
| Rm8530                     | Rm1021 <i>expR</i> <sup>+</sup>                                                                                                            | (16)      |
| Rm11609                    | Rm8530 <i>exoY::Tn5-132 wgaAB::Tn5</i>                                                                                                     | (70)      |
| RG26                       | Rm8530 <i>exoY::pRG53</i>                                                                                                                  | This work |
| RG27                       | Rm8530 $\Delta$ <i>exoY</i>                                                                                                                | This work |
| RG33                       | Rm8530 $\Delta$ <i>wgaAB</i>                                                                                                               | This work |
| RG34                       | Rm8530 $\Delta$ <i>exoY</i> $\Delta$ <i>wgaAB</i>                                                                                          | This work |
| RG35                       | Rm8530 $\Delta$ <i>exoY</i> $\Delta$ <i>wgaAB rhaS::pRG73(wgaAB</i> <sup>+</sup> )                                                         | This work |
| Plasmids                   |                                                                                                                                            |           |
| pAP01                      | <i>P</i> <sub>EL-222</sub> - <i>rbsD</i> -GFP in pSEVA531 backbone, Tc <sup>r</sup>                                                        | This work |
| pAP05                      | pJ23105- <i>rbs34</i> -EI222 and <i>P</i> <sub>EL-222</sub> - <i>rbsD</i> -GFP in pSEVA531, Tc <sup>r</sup>                                | This work |
| pAP15                      | pJ23115- <i>rbs34</i> -EI222 and <i>P</i> <sub>EL-222</sub> - <i>rbsD</i> -GFP in pSEVA531, Tc <sup>r</sup>                                | This work |
| pAP14                      | pJ23105- <i>rbs34</i> -EI222 and <i>P</i> <sub>EL-222</sub> - <i>rbs34</i> -ATG- <i>wgaAB</i> in pSEVA531, Tc <sup>r</sup>                 | This work |
| pAP33                      | <i>placI</i> <sup>q</sup> - <i>rbs34</i> -EI222 and <i>P</i> <sub>EL-222</sub> - <i>rbsD</i> -ATG- <i>wgaAB</i> pSEVA531, Tc <sup>r</sup>  | This work |
| pAP34                      | <i>placI</i> <sup>q</sup> - <i>rbs34</i> -EI222 and <i>P</i> <sub>EL-222</sub> - <i>rbs33</i> -ATG- <i>wgaAB</i> pSEVA531, Tc <sup>r</sup> | This work |
| pAP35                      | <i>placI</i> <sup>q</sup> - <i>rbs34</i> -EI222 and <i>P</i> <sub>EL-222</sub> - <i>rbs31</i> -ATG- <i>wgaAB</i> pSEVA531, Tc <sup>r</sup> | This work |
| pAP36                      | <i>placI</i> <sup>q</sup> - <i>rbsD</i> -EI222 and <i>P</i> <sub>EL-222</sub> - <i>rbsD</i> -GTG- <i>wgaAB</i> pSEVA531, Tc <sup>r</sup>   | This work |
| pAP37                      | <i>placI</i> <sup>q</sup> - <i>rbsD</i> -EI222 and <i>P</i> <sub>EL-222</sub> - <i>rbs33</i> -GTG- <i>wgaAB</i> pSEVA531, Tc <sup>r</sup>  | This work |
| pAP38                      | <i>placI</i> <sup>q</sup> - <i>rbsD</i> -EI222 and <i>P</i> <sub>EL-222</sub> - <i>rbs31</i> -GTG- <i>wgaAB</i> pSEVA531, Tc <sup>r</sup>  | This work |
| pAP05EI222                 | pJ23105- <i>rbs34</i> -EI222 in pSEVA531, Tc <sup>r</sup>                                                                                  | This work |
| pAP11GFP                   | pR- <i>rbs34</i> -GFP in pSEVA631, Gm <sup>r</sup>                                                                                         | This work |
| pRG52                      | pGEM:: $\Delta$ <i>exoY</i> , Ap <sup>r</sup>                                                                                              | This work |
| pRG53                      | pJQ200SK:: $\Delta$ <i>exoY</i> , Gm <sup>r</sup>                                                                                          | This work |
| pRG68                      | pGEM:: $\Delta$ <i>wgaAB</i> , Ap <sup>r</sup>                                                                                             | This work |
| pRG70                      | pJQ200SK:: $\Delta$ <i>wgaAB</i> , Gm <sup>r</sup>                                                                                         | This work |
| pRG73                      | pCAP77:: <i>wgaAB</i> <sup>+</sup> , Nm <sup>r</sup>                                                                                       | This work |

517 <sup>a</sup> Tc<sup>r</sup>, tetracycline resistance; Gm<sup>r</sup>, gentamycin resistance; Ap<sup>r</sup>, ampicillin resistance; Nm<sup>r</sup>,  
518 neomycin resistance.  
519

**Figure 1.**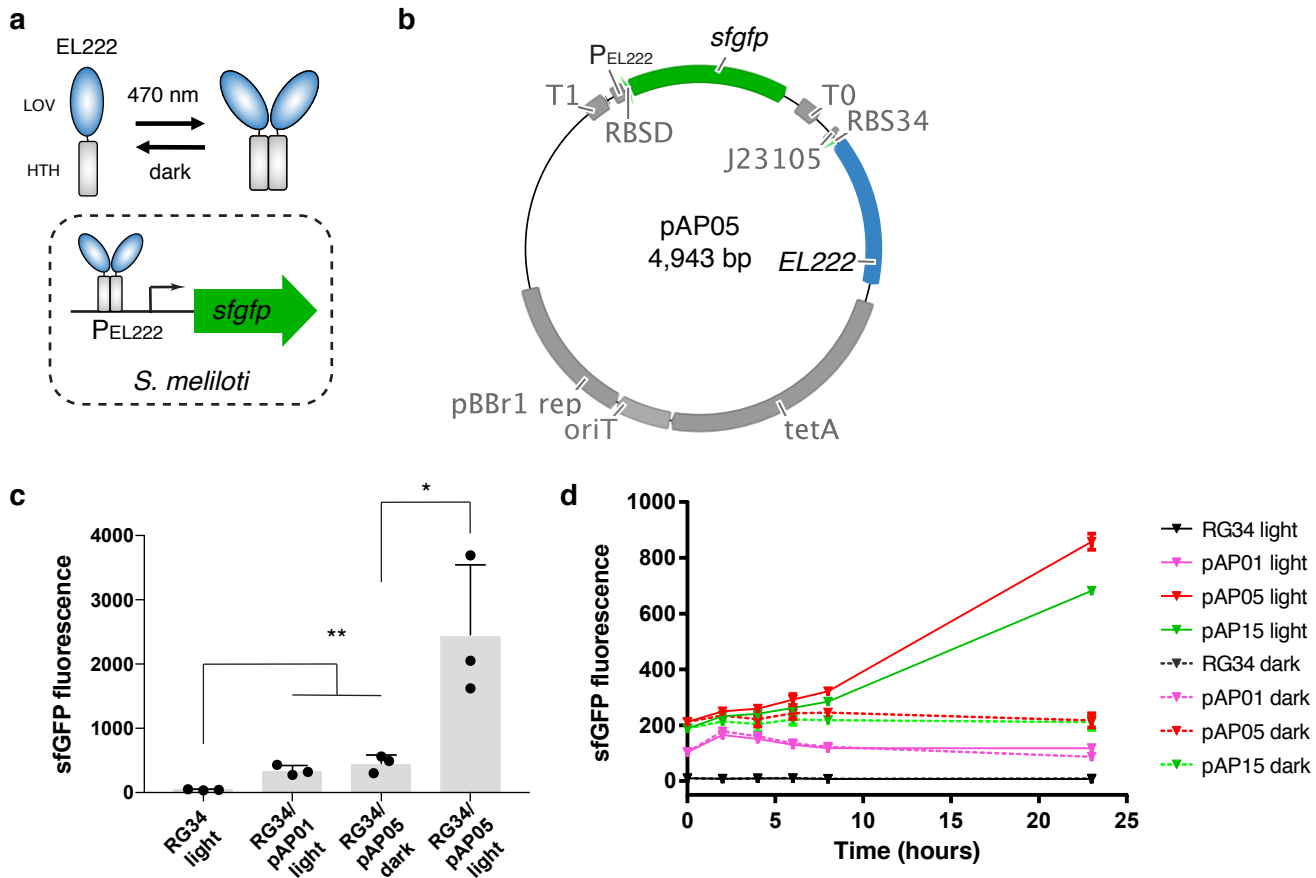

**Figure 2.****a****pAP14**

PEL222

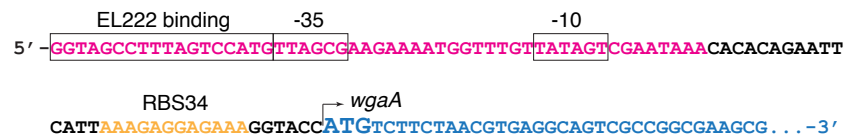**b**

| Start Codon | Ribosome binding site | Resulting plasmid | Light responsiveness |
|-------------|-----------------------|-------------------|----------------------|
| 5'-ATG-3'   | RBS34                 | pAP14(*)          | Inducible            |
|             | RBSD                  | pAP33             | Inducible            |
|             | RBS33                 | pAP34             | Leaky                |
|             | RBS31                 | pAP35             | Leaky                |
| 5'-GTG-3'   | RBSD                  | pAP36             | Poor induction       |
|             | RBS33                 | pAP37             | Leaky                |
|             | RBS31                 | pAP38             | Leaky                |

**c****sedimentation assay (dark)**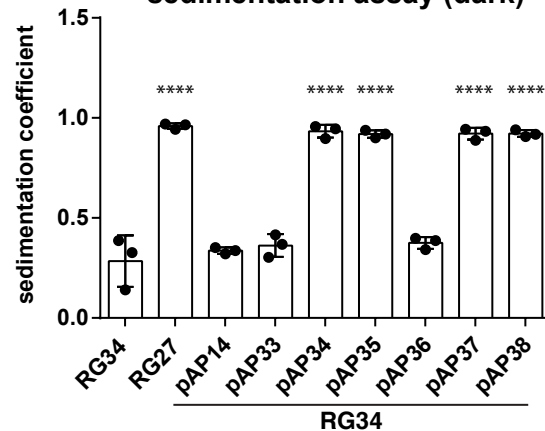**d****anthrone assay**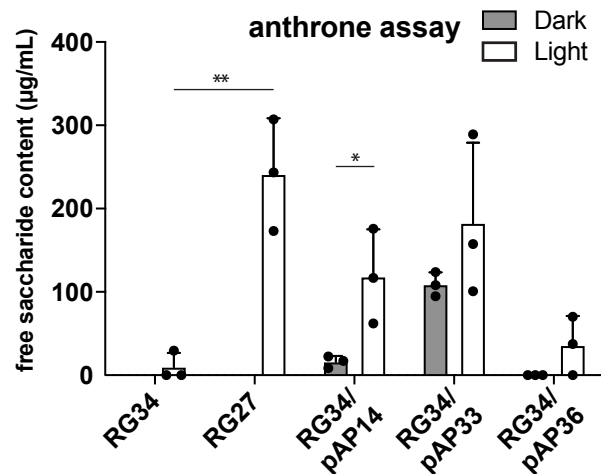



# Figure 3.

**a**

RG34 (EPS I-, EPS II-)

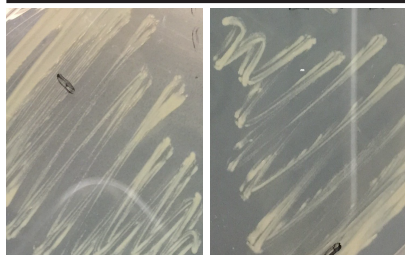

dark

light

RG34/pAP14

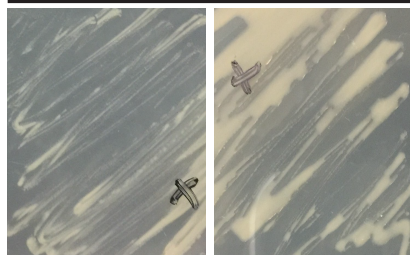

dark

light

**b**

RG34/pAP11GFP (EPS I-, EPS II-)

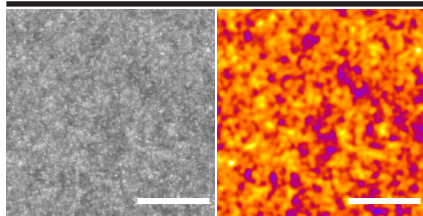

RG27/pAP11GFP (EPS I-, EPS II+)

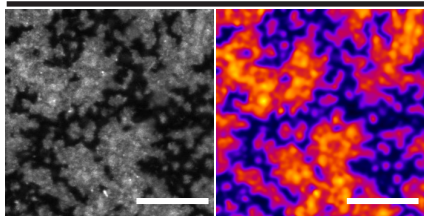

RG34/pAP14+pAP11GFP dark

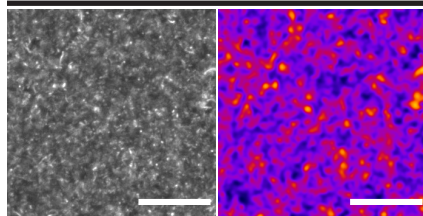

RG34/pAP14+pAP11GFP light

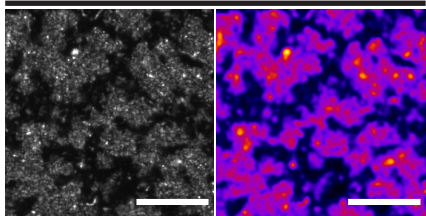

# Figure 4.

RG34/pAP14+pAP11G

illumination duty cycle

**a**

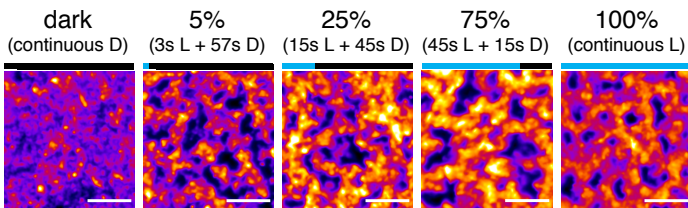

**b**

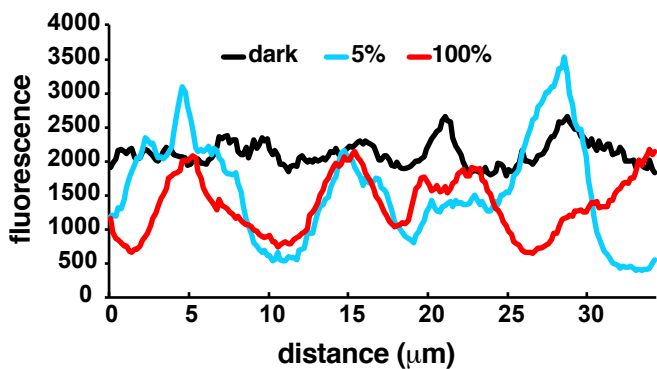

**c**

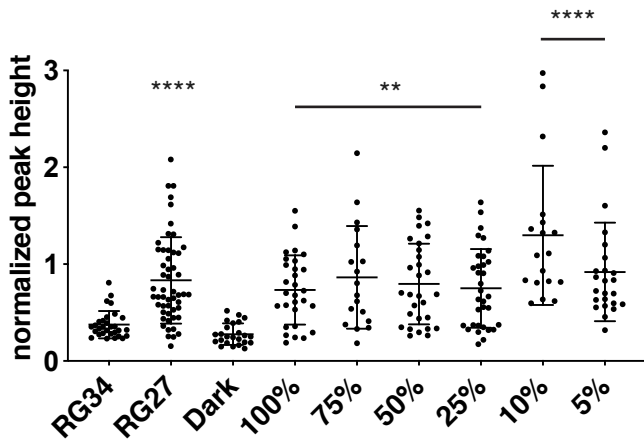

**Figure 5.**

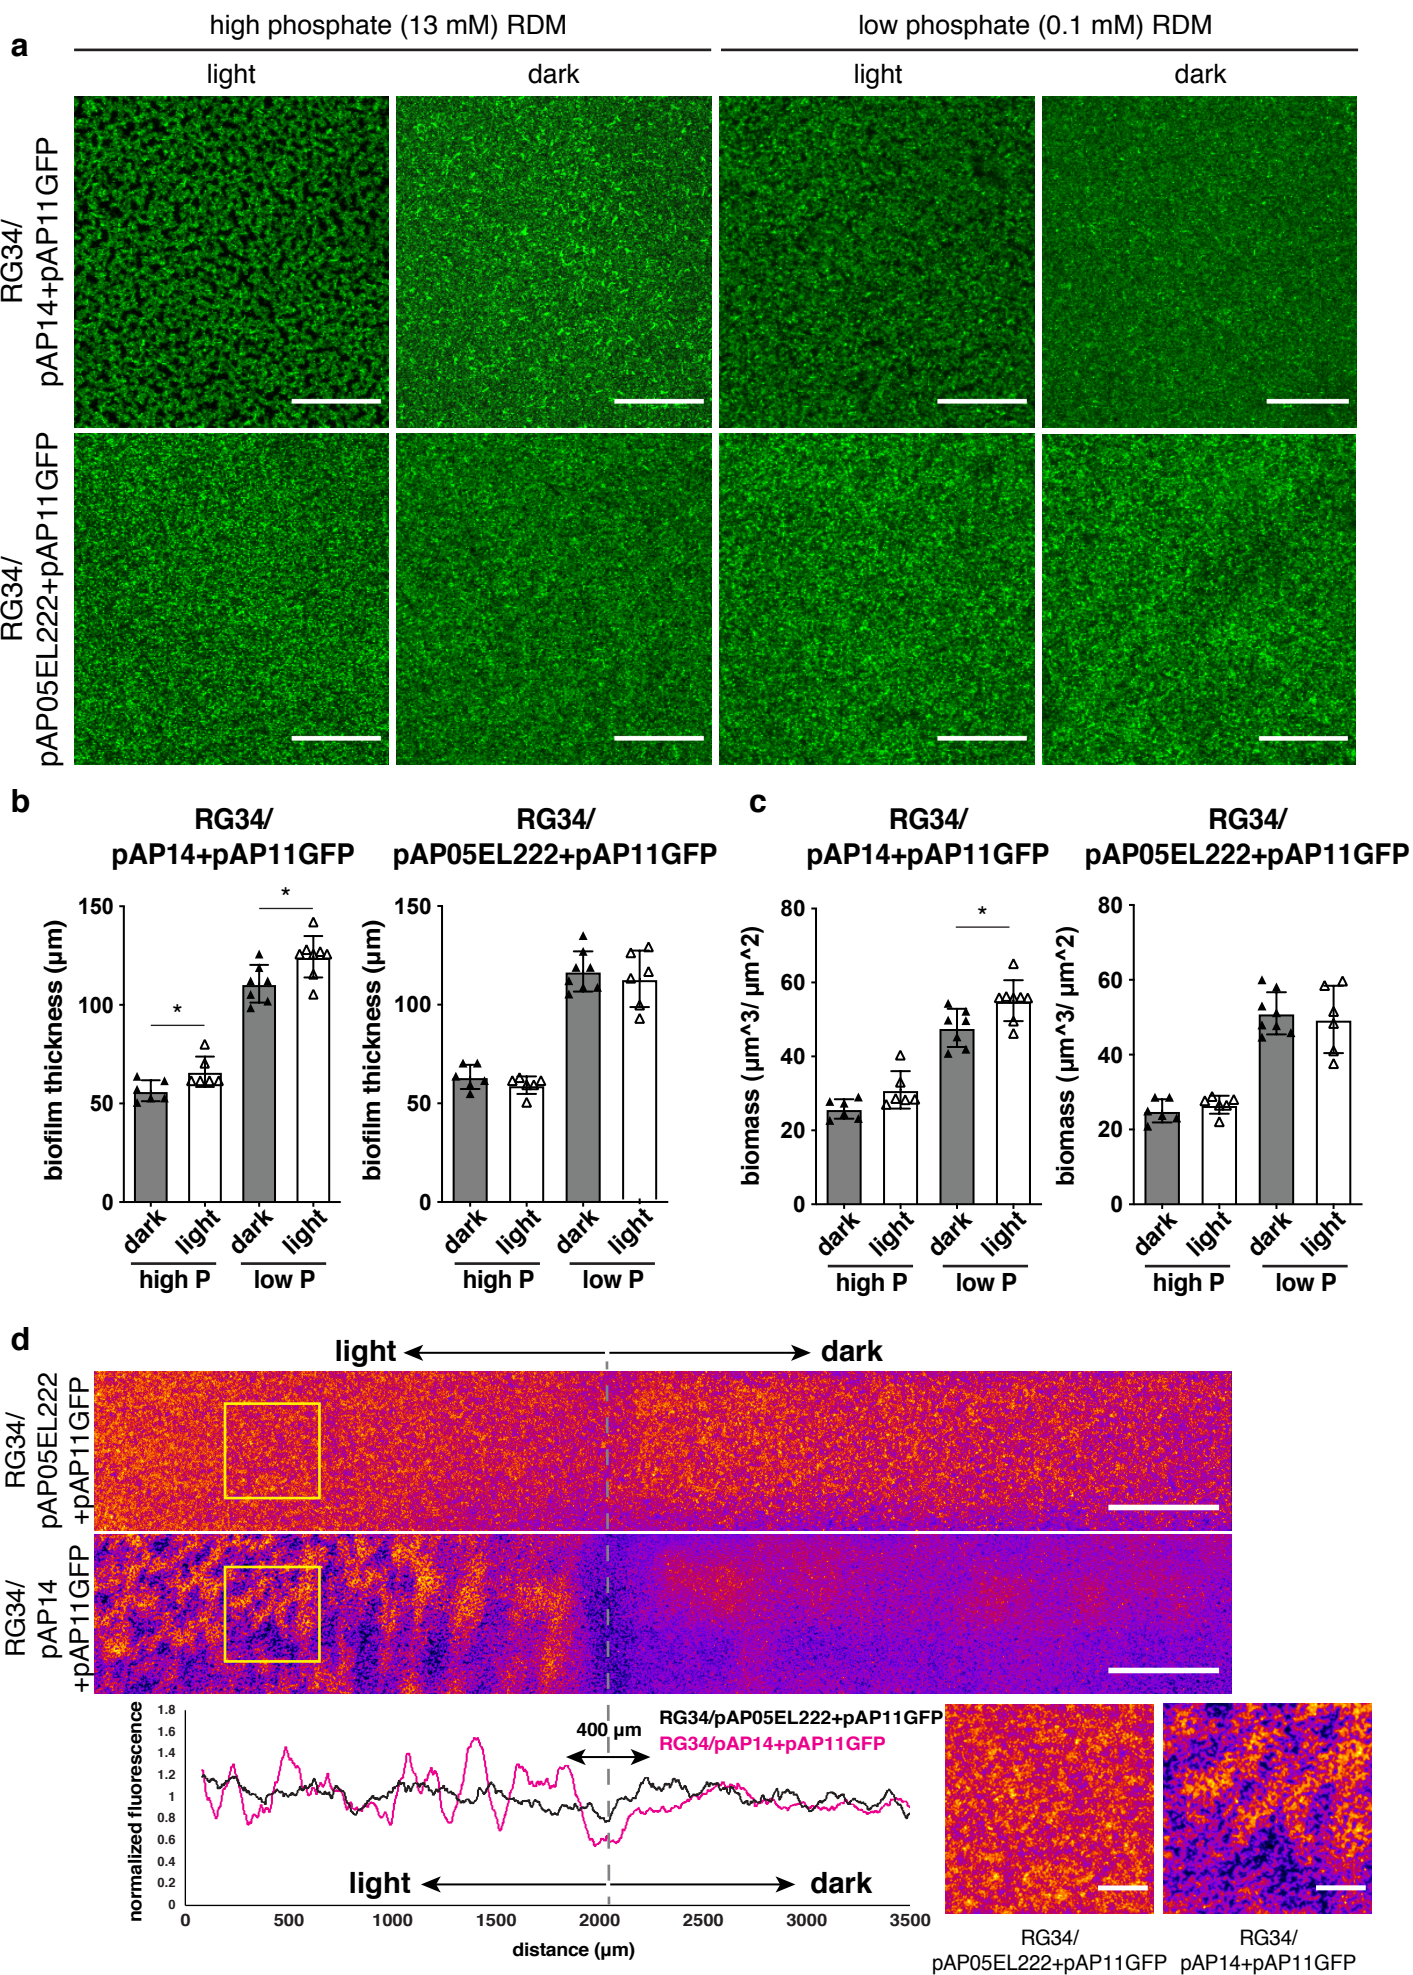

520 **References**

- 521 1. D. F. Herridge, M. B. Peoples, R. M. Boddey, Global inputs of biological nitrogen fixation  
522 in agricultural systems. *Plant and Soil* **311**, 1-18 (2008).
- 523 2. C. C. Cleveland *et al.*, Global patterns of terrestrial biological nitrogen (N<sub>2</sub>) fixation in  
524 natural ecosystems. *Global Biogeochemical Cycles* **13**, 623-645 (1999).
- 525 3. H. H. Zahran, Rhizobium-legume symbiosis and nitrogen fixation under severe  
526 conditions and in an arid climate. *Microbiology and molecular biology reviews* **63**, 968-  
527 989 (1999).
- 528 4. N. Elboutahiri, I. Thami-Alami, S. M. Udupa, Phenotypic and genetic diversity in  
529 *Sinorhizobium meliloti* and *S. medicae* from drought and salt affected regions of  
530 Morocco. *BMC microbiology* **10**, 15 (2010).
- 531 5. D. Capela *et al.*, Analysis of the chromosome sequence of the legume symbiont  
532 *Sinorhizobium meliloti* strain 1021. *Proc Natl Acad Sci U S A* **98**, 9877-9882 (2001).
- 533 6. F. Galibert *et al.*, The composite genome of the legume symbiont *Sinorhizobium meliloti*.  
534 *Science* **293**, 668-672 (2001).
- 535 7. S. Schneiker-Bekel *et al.*, The complete genome sequence of the dominant  
536 *Sinorhizobium meliloti* field isolate SM11 extends the *S. meliloti* pan-genome. *J*  
537 *Biotechnol* **155**, 20-33 (2011).
- 538 8. M. Carelli *et al.*, Genetic diversity and dynamics of *Sinorhizobium meliloti* populations  
539 nodulating different alfalfa cultivars in Italian soils. *Appl Environ Microbiol* **66**, 4785-4789  
540 (2000).
- 541 9. T. M. Finan *et al.*, The complete sequence of the 1,683-kb pSymB megaplasmid from  
542 the N<sub>2</sub>-fixing endosymbiont *Sinorhizobium meliloti*. *Proc Natl Acad Sci U S A* **98**, 9889-  
543 9894 (2001).
- 544 10. H. C. Flemming, T. R. Neu, D. J. Wozniak, The EPS matrix: the "house of biofilm cells".  
545 *J Bacteriol* **189**, 7945-7947 (2007).
- 546 11. A. Dragos, A. T. Kovacs, The Peculiar Functions of the Bacterial Extracellular Matrix.  
547 *Trends Microbiol* **25**, 257-266 (2017).
- 548 12. C. D. Nadell, K. Drescher, K. R. Foster, Spatial structure, cooperation and competition in  
549 biofilms. *Nat Rev Microbiol* **14**, 589-600 (2016).
- 550 13. J. A. Leigh, E. R. Signer, G. C. Walker, Exopolysaccharide-deficient mutants of  
551 *Rhizobium meliloti* that form ineffective nodules. *Proc Natl Acad Sci U S A* **82**, 6231-  
552 6235 (1985).
- 553 14. J. A. Leigh, J. W. Reed, J. F. Hanks, A. M. Hirsch, G. C. Walker, *Rhizobium meliloti*  
554 mutants that fail to succinylate their calcofluor-binding exopolysaccharide are defective  
555 in nodule invasion. *Cell* **51**, 579-587 (1987).

- 556 15. D. J. Gage, Infection and invasion of roots by symbiotic, nitrogen-fixing rhizobia during  
557 nodulation of temperate legumes. *Microbiol Mol Biol Rev* **68**, 280-300 (2004).
- 558 16. J. Glazebrook, G. C. Walker, A novel exopolysaccharide can function in place of the  
559 calcofluor-binding exopolysaccharide in nodulation of alfalfa by *Rhizobium meliloti*. *Cell*  
560 **56**, 661-672 (1989).
- 561 17. A. Becker *et al.*, The 32-kilobase *exp* gene cluster of *Rhizobium meliloti* directing the  
562 biosynthesis of galactoglucan: genetic organization and properties of the encoded gene  
563 products. *J Bacteriol* **179**, 1375-1384 (1997).
- 564 18. M. A. Glucksmann, T. L. Reuber, G. C. Walker, Genes needed for the modification,  
565 polymerization, export, and processing of succinoglycan by *Rhizobium meliloti*: a model  
566 for succinoglycan biosynthesis. *J Bacteriol* **175**, 7045-7055 (1993).
- 567 19. M. A. Glucksmann, T. L. Reuber, G. C. Walker, Family of glycosyl transferases needed  
568 for the synthesis of succinoglycan by *Rhizobium meliloti*. *J Bacteriol* **175**, 7033-7044  
569 (1993).
- 570 20. A. Skorupska, M. Janczarek, M. Marczak, A. Mazur, J. Krol, Rhizobial  
571 exopolysaccharides: genetic control and symbiotic functions. *Microb Cell Fact* **5**, 7  
572 (2006).
- 573 21. A. Becker, A. Kleickmann, M. Keller, W. Arnold, A. Puhler, Identification and analysis of  
574 the *Rhizobium meliloti* *exoAMONP* genes involved in exopolysaccharide biosynthesis  
575 and mapping of promoters located on the *exoHKLAMONP* fragment. *Mol Gen Genet*  
576 **241**, 367-379 (1993).
- 577 22. T. L. Reuber, G. C. Walker, Biosynthesis of succinoglycan, a symbiotically important  
578 exopolysaccharide of *Rhizobium meliloti*. *Cell* **74**, 269-280 (1993).
- 579 23. M. Janczarek, Environmental signals and regulatory pathways that influence  
580 exopolysaccharide production in rhizobia. *Int J Mol Sci* **12**, 7898-7933 (2011).
- 581 24. C. Bahlawane, B. Baumgarth, J. Serrania, S. Ruberg, A. Becker, Fine-tuning of  
582 galactoglucan biosynthesis in *Sinorhizobium meliloti* by differential *WggR* (*ExpG*)-,  
583 *PhoB*-, and *MucR*-dependent regulation of two promoters. *J Bacteriol* **190**, 3456-3466  
584 (2008).
- 585 25. A. Becker, The 32-Kilobase *exp* Gene Cluster of *Rhizobium meliloti* Directing the  
586 Biosynthesis of Galactoglucan: Genetic Organization and Properties of the Encoded  
587 Gene Products. *Journal of Bacteriology* **Vol. 179, No. 4**, p. 1375–1384 (1997).
- 588 26. K. E. Mendrygal, Environmental Regulation of Exopolysaccharide Production in  
589 *Sinorhizobium meliloti*. *Journal Of Bacteriology* **Vol. 182, No. 3**, p. 599–606 (2000).
- 590 27. H. Zhan, Induction of the Second Exopolysaccharide (EPSb) in *Rhizobium*  
591 *meliloti* SU47 by Low Phosphate Concentrations, . *Journal of Bacteriology* **Vol. 173, No. 22**, p.  
592 7391-7394 (199).
- 593 28. E. Jofré, Production of Succinoglycan Polymer in

- 594 Sinorhizobium meliloti Is Affected by SMb21506  
595 and Requires the N-terminal Domain of ExoP. *Molecular Plant-Microbe Interactions* **Vol. 22**, pp.  
596 1656–1668 (2009).
- 597 29. M. W. Breedveld, Osmotically induced oligo- and polysaccharide synthesis by  
598 Rhizobium meliloti SU-47. *Journal of General Microbiology* 2511-2519 (1990).
- 599 30. L. V. Rinaudi, J. E. Gonzalez, The low-molecular-weight fraction of exopolysaccharide II  
600 from Sinorhizobium meliloti is a crucial determinant of biofilm formation. *J Bacteriol* **191**,  
601 7216-7224 (2009).
- 602 31. M. M. Marketon, S. A. Glenn, A. Eberhard, J. E. Gonzalez, Quorum sensing controls  
603 exopolysaccharide production in Sinorhizobium meliloti. *J Bacteriol* **185**, 325-331 (2003).
- 604 32. B. J. Pellock, M. Teplitski, R. P. Boinay, W. D. Bauer, G. C. Walker, A LuxR homolog  
605 controls production of symbiotically active extracellular polysaccharide II by  
606 Sinorhizobium meliloti. *J Bacteriol* **184**, 5067-5076 (2002).
- 607 33. H. H. Hoang, A. Becker, J. E. Gonzalez, The LuxR homolog ExpR, in combination with  
608 the Sin quorum sensing system, plays a central role in Sinorhizobium meliloti gene  
609 expression. *J Bacteriol* **186**, 5460-5472 (2004).
- 610 34. M. McIntosh, E. Krol, A. Becker, Competitive and cooperative effects in quorum-sensing-  
611 regulated galactoglucan biosynthesis in Sinorhizobium meliloti. *J Bacteriol* **190**, 5308-  
612 5317 (2008).
- 613 35. S. Ruberg, Biosynthesis of the exopolysaccharide galactoglucan in *Sinorhizobium*  
614 *meliloti* is subject to a complex control by the phosphate dependent regulator PhoB and  
615 the proteins ExpG and MucR. *Micribiology* **145**, 603-611 (1999).
- 616 36. K. E. Mendrygal, J. E. González, Environmental regulation of exopolysaccharide  
617 production in Sinorhizobium meliloti. *Journal of bacteriology* **182**, 599-606 (2000).
- 618 37. K. Mueller, J. E. González, Complex regulation of symbiotic functions is coordinated by  
619 MucR and quorum sensing in Sinorhizobium meliloti. *Journal of bacteriology* **193**, 485-  
620 496 (2011).
- 621 38. A. Becker *et al.*, Global changes in gene expression in Sinorhizobium meliloti 1021  
622 under microoxic and symbiotic conditions. *Molecular Plant-Microbe Interactions* **17**, 292-  
623 303 (2004).
- 624 39. J. E. Gonzalez, G. M. York, G. C. Walker, Rhizobium meliloti exopolysaccharides:  
625 synthesis and symbiotic function. *Gene* **179**, 141-146 (1996).
- 626 40. B. J. Pellock, H. P. Cheng, G. C. Walker, Alfalfa root nodule invasion efficiency is  
627 dependent on Sinorhizobium meliloti polysaccharides. *J Bacteriol* **182**, 4310-4318  
628 (2000).
- 629 41. F. G. Sorroche, L. V. Rinaudi, A. Zorreguieta, W. Giordano, EPS II-dependent  
630 autoaggregation of Sinorhizobium meliloti planktonic cells. *Curr Microbiol* **61**, 465-470  
631 (2010).

- 632 42. Y.-S. Guo *et al.*, Bacterial Extracellular Polymeric Substances Amplify Water Content  
633 Variability at the Pore Scale. *Frontiers in Environmental Science* **6** (2018).
- 634 43. B. C. Cruz *et al.*, Pore-scale water dynamics during drying and the impacts of structure  
635 and surface wettability. *Water Resources Research* **53**, 5585-5600 (2017).
- 636 44. J. Deng *et al.*, Synergistic effects of soil microstructure and bacterial EPS on drying rate  
637 in emulated soil micromodels. *Soil Biology and Biochemistry* **83**, 116-124 (2015).
- 638 45. C. Arango Pinedo, D. J. Gage, Plasmids that insert into the rhamnose utilization locus,  
639 rha: a versatile tool for genetic studies in *Sinorhizobium meliloti*. *J Mol Microbiol*  
640 *Biotechnol* **17**, 201-210 (2009).
- 641 46. J.-D. Pédelacq, S. Cabantous, T. Tran, T. C. Terwilliger, G. S. Waldo, Engineering and  
642 characterization of a superfolder green fluorescent protein. *Nature biotechnology* **24**, 79-  
643 88 (2006).
- 644 47. Z. C. Yuan, R. Zaheer, T. M. Finan, Phosphate limitation induces catalase expression in  
645 *Sinorhizobium meliloti*, *Pseudomonas aeruginosa* and *Agrobacterium tumefaciens*. *Mol*  
646 *Microbiol* **58**, 877-894 (2005).
- 647 48. R. Silva-Rocha *et al.*, The Standard European Vector Architecture (SEVA): a coherent  
648 platform for the analysis and deployment of complex prokaryotic phenotypes. *Nucleic*  
649 *acids research* **41**, D666-D675 (2013).
- 650 49. C. Engler, R. Kandzia, S. Marillonnet, A one pot, one step, precision cloning method with  
651 high throughput capability. *PLoS One* **3**, e3647 (2008).
- 652 50. A. Takakado, Y. Nakasone, M. Terazima, Photoinduced dimerization of a photosensory  
653 DNA-binding protein EL222 and its LOV domain. *Physical Chemistry Chemical Physics*  
654 **19**, 24855-24865 (2017).
- 655 51. P. Jayaraman *et al.*, Blue light-mediated transcriptional activation and repression of gene  
656 expression in bacteria. *Nucleic Acids Res* **44**, 6994-7005 (2016).
- 657 52. A. Heydorn *et al.*, Quantification of biofilm structures by the novel computer program  
658 COMSTAT. *Microbiology* **146** ( Pt 10), 2395-2407 (2000).
- 659 53. D. Verotta, J. Haagensen, A. M. Spormann, K. Yang, Mathematical Modeling of Biofilm  
660 Structures Using COMSTAT Data. *Comput Math Methods Med* **2017**, 7246286 (2017).
- 661 54. H. R. Bonomi *et al.*, Light regulates attachment, exopolysaccharide production, and  
662 nodulation in *Rhizobium leguminosarum* through a LOV-histidine kinase photoreceptor.  
663 *Proc Natl Acad Sci U S A* **109**, 12135-12140 (2012).
- 664 55. A. Losi, W. Gartner, Bacterial bilin- and flavin-binding photoreceptors. *Photochem*  
665 *Photobiol Sci* **7**, 1168-1178 (2008).
- 666 56. A. I. Nash *et al.*, Structural basis of photosensitivity in a bacterial light-oxygen-  
667 voltage/helix-turn-helix (LOV-HTH) DNA-binding protein. *Proc Natl Acad Sci U S A* **108**,  
668 9449-9454 (2011).

- 669 57. B. D. Zoltowski, L. B. Motta-Mena, K. H. Gardner, Blue light-induced dimerization of a  
670 bacterial LOV-HTH DNA-binding protein. *Biochemistry* **52**, 6653-6661 (2013).
- 671 58. R. Silva-Rocha *et al.*, The Standard European Vector Architecture (SEVA): a coherent  
672 platform for the analysis and deployment of complex prokaryotic phenotypes. *Nucleic  
673 Acids Res* **41**, D666-675 (2013).
- 674 59. A. Khmelinskii *et al.*, Incomplete proteasomal degradation of green fluorescent proteins  
675 in the context of tandem fluorescent protein timers. *Mol Biol Cell* **27**, 360-370 (2016).
- 676 60. D. L. Morris, Quantitative Determination of Carbohydrates With Dreywood's Anthrone  
677 Reagent. *Science* **107**, 254-255 (1948).
- 678 61. N. A. Fujishige *et al.*, Rhizobium common nod genes are required for biofilm formation.  
679 *Mol Microbiol* **67**, 504-515 (2008).
- 680 62. B. D. Zoltowski, A. I. Nash, K. H. Gardner, Variations in protein-flavin hydrogen bonding  
681 in a light, oxygen, voltage domain produce non-Arrhenius kinetics of adduct decay.  
682 *Biochemistry* **50**, 8771-8779 (2011).
- 683 63. L. B. Motta-Mena *et al.*, An optogenetic gene expression system with rapid activation  
684 and deactivation kinetics. *Nat Chem Biol* **10**, 196-202 (2014).
- 685 64. S. R. Long, B. J. Staskawicz, Prokaryotic plant parasites. *Cell* **73**, 921-935 (1993).
- 686 65. A. M. Hirsch, M. R. Lum, J. A. Downie, What makes the rhizobia-legume symbiosis so  
687 special? *Plant Physiol* **127**, 1484-1492 (2001).
- 688 66. S. R. Long, Genes and signals in the rhizobium-legume symbiosis. *Plant Physiol* **125**,  
689 69-72 (2001).
- 690 67. H. Downie *et al.*, Transparent soil for imaging the rhizosphere. *PLoS One* **7**, e44276  
691 (2012).
- 692 68. R. Rellán-Álvarez *et al.*, GLO-Roots: an imaging platform enabling multidimensional  
693 characterization of soil-grown root systems. *Elife* **4**, e07597 (2015).
- 694 69. L. S. Meade HM, Ruvkun GB, Brown SE, Physical and genetic characterization of  
695 symbiotic and auxotrophic mutants of *Rhizobium meliloti* induced by transposon Tn5  
696 mutagenesis. *Journal of Bacteriology* (1982).
- 697 70. G. J. Mueller K, Complex regulation of symbiotic functions is coordinated by MucR and  
698 quorum sensing in *Sinorhizobium meliloti*. . *Journal of Bacteriology* (2011).  
699



## Supporting Information

Optogenetics in *Sinorhizobium meliloti* enables spatial control of exopolysaccharide production and biofilm structure

Azady Pirhanov, Charles M. Bridges, Reed A. Goodwin, Yi-Syuan Guo, Jessica Furrer, Leslie M. Shor, Daniel J. Gage, Yong Ku Cho

## Supplementary Methods

**Plasmid and strain construction.** *Escherichia coli* XL1-Blue (Tet<sup>r</sup>) or XL1-Blue MRF' (Kan<sup>r</sup>) (Stratagene) were used for all cloning steps. *E. coli* strains were routinely grown in LB medium (10g/L tryptone (Bacto), 5 g/L yeast extract (Bacto), 10 g/L NaCl (Fisher), solidified with 15 g/L agar (Bacto) when required), at 37°C. *Sinorhizobium meliloti* 8530 (1) (Rm8530 Str<sup>r</sup>) was used as the parental strain for construction of EPS deletion mutants and was routinely grown in TY medium (6 g/L tryptone, 3 g/L yeast extract, 0.38 g/L CaCl<sub>2</sub> solidified with 15 g/L agar when required containing 500 µg/mL streptomycin sulfate (Sm)) at 30°C for 3-5 days. Broth cultures were shaken at 225 rpm (*E. coli*) or 150 rpm (*S. meliloti*). All strains were made electrocompetent as previously described (2). Plasmids were introduced by electroporation using approximately 10-100 ng plasmid DNA with an electric field strength of 1800 V (*E. coli*) or 2300 V (*S. meliloti*). Strains were allowed to recover in SOC medium (10 g/L tryptone, 2.5 g/L yeast extract, 0.6 g/L NaCl, 0.2 g/L KCl, 0.952 g/L MgCl<sub>2</sub>, 3.6 g/L D-glucose) for 1 hour (*E. coli*) or 4 hours (*S. meliloti*) at 37°C or 30°C, respectively. All kits were used according to manufacturer instructions. Plasmid pSEVA531 (3) was kindly provided by Victor de Lorenzo (National Center for Biotechnology (CNB), Madrid, Spain). Rm8530 genomic DNA (gDNA) was prepared (Promega Wizard Genomic DNA Purification Kit) and used as template for PCR. Deletions in mutant strains were confirmed by PCR and bi-directional dideoxy sequencing. Relevant strains are listed in the 'Strains' section of **Table 1**. Primers used are listed in **Supp. Table 2**.

**Creation of the Rm8530 Δ*exoY* mutant.** To create a mutant deficient in EPS I production an overlap extension protocol was used. The 5' and 3' ends of *exoY* (SMb20946) were amplified separately using Phusion DNA polymerase (NEB) and primers *exoY\_5'\_F\_XhoI* and *exoY\_5'\_R* to generate a 650bp fragment containing sequence upstream of *exoY* and containing the first four codons of the open reading frame, and primers *exoY\_3'\_F* and *exoY\_3'\_R\_BamHI* to generate a 500bp fragment containing the last 43 codons of *exoY* and extending into downstream *exoF* (SMb20945). Internal primers *exoY\_5'\_R* and *exoY\_3'\_F* 12 bp tails contained complementarity binding regions, allowing the use of PCR overlap extension (4) to scarlessly stitch amplicons together in-frame. First-round amplicons were purified and external primers *exoY\_5'\_F\_XhoI* and *exoY\_3'\_R\_BamHI* were used in the second-round PCR to create the chimeric *exoY* recombination locus. Second-round amplicons were gel-extracted, A-tailed and cloned into pGEM-T Easy. Ligations were introduced into *E. coli* XL1-Blue by

electroporation as described and plasmid-containing clones selected on agar-solidified LB containing 50 µg/mL ampicillin (Ap.), 200 µM IPTG and 100 µM X-gal. Single, clone-positive (confirmed by PCR), colonies were used to inoculate LB cultures containing 50 µg/mL Ap. Cultures were used for freezer stocks and plasmid preparation. Plasmid containing the fused 5' and 3' *exoY* coding sequences was isolated and named pRG52. Plasmid pRG52 was double-digested with *Bam*HI-HF and *Xho*I to excise the  $\Delta$ *exoY* fragment and cloned into the suicide plasmid pJQ200SK (5) that had been digested in the same manner in the presence of rSAP. The  $\Delta$ *exoY* fragment from pRG52 was ligated into the linearized pJQ200SK and the resulting plasmid was named pRG53. Plasmid pRG53 was introduced into Rm8530 by electroporation and cells were plated on TY supplemented with 30 µg/mL Gm to select for single-crossover mutants. 100 µL of sterile 10X M9 salts (58 g/L Na<sub>2</sub>HPO<sub>4</sub> (Fisher), 30 g/L KH<sub>2</sub>PO<sub>4</sub> (Fisher) 5 g/L NaCl, 10 g/L NH<sub>4</sub>Cl (Fisher)) was added to provide phosphate levels needed to help suppress EPS II production. Plates were incubated 3 days at 30°C and single colonies screened for single-crossover events by PCR targeting pRG53 plasmid sequence using primers M13\_F and *exoY\_3'\_R\_Bam*HI. Rm8530 containing integrated pRG53 was named strain RG26. To counterselect against plasmid pRG53, RG26 was grown in TY broth to stationary phase, serially diluted and plated on TY containing 5% sucrose. Sucrose-resistant colonies were screened by PCR using primers *exoY\_5'\_F\_Xho*I and *exoY\_3'\_R\_Bam*HI and transformants that produced truncated *exoY* amplicons were purified on TY. Rm8530 containing an in-frame deletion of *exoY* from codons 5-184 was confirmed by dideoxy sequencing using primers *exoY\_seq\_F* and *exoY\_seq\_R* as described above and named strain RG27( $\Delta$ *exoY*).

**Creation of  $\Delta$ *wgaAB* mutant.** Expression of the *wga* (formerly *expA*) operon has been shown to be required for EPS II production (1). To create a mutant deficient in EPS II production, we targeted *wgaB* (SMb21320, formerly *expA23*), which encodes a putative glycosyltransferase. Due to the translational coupling of *wgaB* with the immediately upstream gene *wgaA* (SMb21319), the entire *wgaAB* locus including the *wgaAB* ribosome binding site (RBS) was targeted for deletion to reduce the risk of inefficient expression of *wgaB* from the *wga* promoter during complementation of the deletion. Rm8530 gDNA template was amplified using Phusion polymerase and the primer sets *wgaAB\_5'\_F\_Spe*I and *wgaAB\_5'\_R* which amplify a 1.1 kb fragment containing the 5' end of *wgcA* and most of the *wga* promoter, or *wgaAB\_3'\_F* and *wgaAB\_3'\_R\_Not*I to amplify a 1.0 kb fragment containing most of the downstream gene *wgaD* (SMb21321). Primers *wgaAB\_5'\_R* and *wgaAB\_3'\_F* were designed with 19 bp complimentary overlapping sequence which reconstitutes the *wgaD* RBS such that the final  $\Delta$ *wgaAB* mutant

expresses *wgaD* and remaining downstream *wga* genes directly from the *wga* promoter. The 5' and 3' fragments of *wgaAB* were gel purified and stitched together using external primers *wgaAB\_5'\_F\_SpeI* and *wgaAB\_3'\_R\_NotI* and cloned into pGEM-T Easy. Ligations were introduced into *E. coli* XL1-Blue and transformants screened for plasmid as described above. Transformants were screened and purified as described above and the plasmid named pRG68. pRG68 was double-digested using *NotI*-HF and *SpeI*-HF (NEB) to excise the  $\Delta wgaAB$  fragment. pJQ200SK was linearized using the same enzymes in the presence of rSAP. The  $\Delta wgaAB$  fragments were ligated to linearized pJQ200SK and introduced into *E. coli* XL1-Blue as described above. Transformants were screened and purified and the plasmid named pRG70. Single and double crossovers of pRG70 in *S. meliloti* strain Rm8530 were made using the same methods described above. Strain Rm8530 containing a complete deletion of *wgaAB* open reading frames was confirmed by PCR and dideoxy sequencing using primers *wgcA\_seq\_F* and *wgaD\_seq\_R* as described above and named strain RG33.

**Creation of  $\Delta exoY \Delta wgaAB$  double deletion mutant.** To create a mutant deficient in both EPS I and EPS II biosynthesis, *S. meliloti*  $\Phi N3$  (6) was used to transduce the single crossover *exoY::pRG53* in *S. meliloti* strain RG26 into strain RG33 (Rm8530  $\Delta wgaAB$ ). Strain RG26 was grown to late exponential phase in TY broth containing 30  $\mu\text{g}/\text{mL}$  Gm at 30°C. Serial 10-fold dilutions of  $\Phi N3$  in 10 mM  $\text{MgSO}_4$  were created and each dilution combined with 100  $\mu\text{L}$  RG26 culture. Phage-cell mixtures were allowed to adsorb for 30 minutes at 30°C, and each was transferred to 2 mL melted TY soft agar (0.75% agar) and poured over LB plates containing 30  $\mu\text{g}/\text{mL}$  Gm. Plates were incubated at 30°C until plaques were visible, and plates containing confluent lysis were flooded with 4 mL TY broth incubated at 4°C to elute phage particles containing RG26 genomic loci. Lysate was collected, passed through a 0.45  $\mu\text{m}$  nylon filter and a few drops of chloroform (Sigma) were added to give a RG26  $\Phi N3$  lysate. Strain RG33 was grown to late exponential phase at 30°C in TY broth and 200  $\mu\text{L}$  volumes mixed with 0, 10, 50, 100 or 200  $\mu\text{L}$  volumes of RG26  $\Phi N3$  lysate. Phage were allowed to adsorb for 20 minutes at 30°C and 1 mL LB broth added to each tube. Cells were washed 3 times in LB broth and suspended in 75  $\mu\text{L}$  of LB containing 10mM sodium citrate. Prepared cells were plated on TY without  $\text{CaCl}_2$  containing 30  $\mu\text{g}/\text{mL}$  Gm and incubated at 30°C. Transductants were screened for the presence of *exoY::pRG53* by PCR using GoTaq polymerase and primers *M13\_F* and *exoY\_3'\_R\_BamI*. Insert-positive colonies were purified on TY containing 30  $\mu\text{g}/\text{mL}$  Gm. To allow plasmid excision and formation of  $\Delta exoY$ , broth cultures of RG33( $\Delta wgaAB$ , *exoY::pRG53*) underwent sucrose counterselection as described above. Colonies were PCR screened for the

*exoY* deletion using GoTaq and primers *exoY\_5'\_F\_XhoI* and *exoY\_3'\_R\_BamHI* and recombinants exhibiting a deletion in *exoY* were purified on TY. A single recombinant was selected and di-deoxy sequenced to confirm genotype  $\Delta$ *exoY*  $\Delta$ *wgaAB*. This *S. meliloti* EPS I and EPS II double mutant was named strain RG34.

**Complementation of  $\Delta$ *wgaAB* mutant.** To ensure that RG33 ( $\Delta$ *wgaAB*) and its derivatives could be complemented to restore the ability to biosynthesize EPS II, *wgaAB* was cloned onto a suicide plasmid and inserted into the *rhaS* (SMc02324) locus on the RG34 chromosome by single recombination (2). Briefly, Rm8530 gDNA was used as template to PCR amplify *wgaAB* with the native *wga* promoter region using Phusion polymerase and primers *wgaA\_comp\_F* and *wgaD\_comp\_R*, which contain 16 or 18 bp overhangs with complementarity to pCAP77, respectively. The 4.5 kb *wgaAB* amplicon along with *EcoRI/HindIII* digested pCAP77[2] were checked for correct size by gel electrophoresis and the remainder of the PCR and restriction digest column purified and assembled using Gibson Assembly. Assemblies were introduced into XL1-Blue MRF' and transformants were screened using primers M13\_R and *wgaA\_scrn\_R*. Plasmid was isolated from a single transformant exhibiting the correct amplicon and named pRG73. RG34 (Rm8530  $\Delta$ *exoY*  $\Delta$ *wgaAB*) electrocompetent cells were prepared and transformed with pRG73. Recovered cells were plated on TY containing 100  $\mu$ g/mL neomycin sulfate and incubated at 30°C. Several mucoid colonies resembling wild-type Rm8530 were streaked to singles on the same medium and M9 medium (1X M9 salts, 0.1 mM CaCl<sub>2</sub>, 1 mM MgSO<sub>4</sub>, 5 ng/mL CoCl<sub>2</sub>, 0.5  $\mu$ g/mL biotin) containing 0.4% L-rhamnose, 500  $\mu$ g/mL Sm and 100  $\mu$ g/mL Nm. Transformants were screened for their inability to grow on rhamnose as the sole source of carbon. Isolates exhibiting robust growth on TY but poor growth on rhamnose were retained for PCR screening of the *rhaS* locus using GoTaq polymerase and primers *rhaS\_Nterm\_F* and *wgaA\_scrn\_R*. Candidates exhibiting the expected amplicon size were grown to stationary phase in LB broth containing 2.5 mM MgSO<sub>4</sub>, 2.5 mM CaCl<sub>2</sub> and 100  $\mu$ g/mL Nm. A single candidate exhibiting poor growth on rhamnose and the functional rescue of EPS II biosynthesis was selected and named strain RG35.

### Confirmation of EPS I/II deficiency in deletion strains

To compare the succinoglycan (EPS I) biosynthesis phenotypes of parental and deletion strains, Rm1021 (7), Rm8530, Rm11609 (8), RG27 and RG34 were streaked on MGS medium (50 mM morpholinepropanesulfonic acid (MOPS) 19 mM sodium glutamate, 55 mM D-mannitol, 1 mM MgSO<sub>4</sub>, 0.25 mM CaCl<sub>2</sub>, 0.1 mM KH<sub>2</sub>PO<sub>4</sub>, 0.1 mM K<sub>2</sub>HPO<sub>4</sub>) containing 5 ng/mL CoCl<sub>2</sub>, 0.5

$\mu\text{g/mL}$  biotin and 0.02% w/v Calcofluor white M2R (Sigma) and incubated for 5 days at 30°C. Photographs were taken in ambient light or under long-wave UV transillumination to observe fluorescence due to EPS I production (**Supp. Fig. 1**). To assess differences in the mucoid phenotype (EPS II) strains Rm8530, Rm11609, RG34 and RG35 were streaked on the same medium as for EPS I and allowed to grow 5 days at 30°C. Photographs were taken and dense growth was visually assessed for the typical mucoid phenotype resulting from EPS II biosynthesis (**Supp. Fig. 2**).

## Supplementary Figures

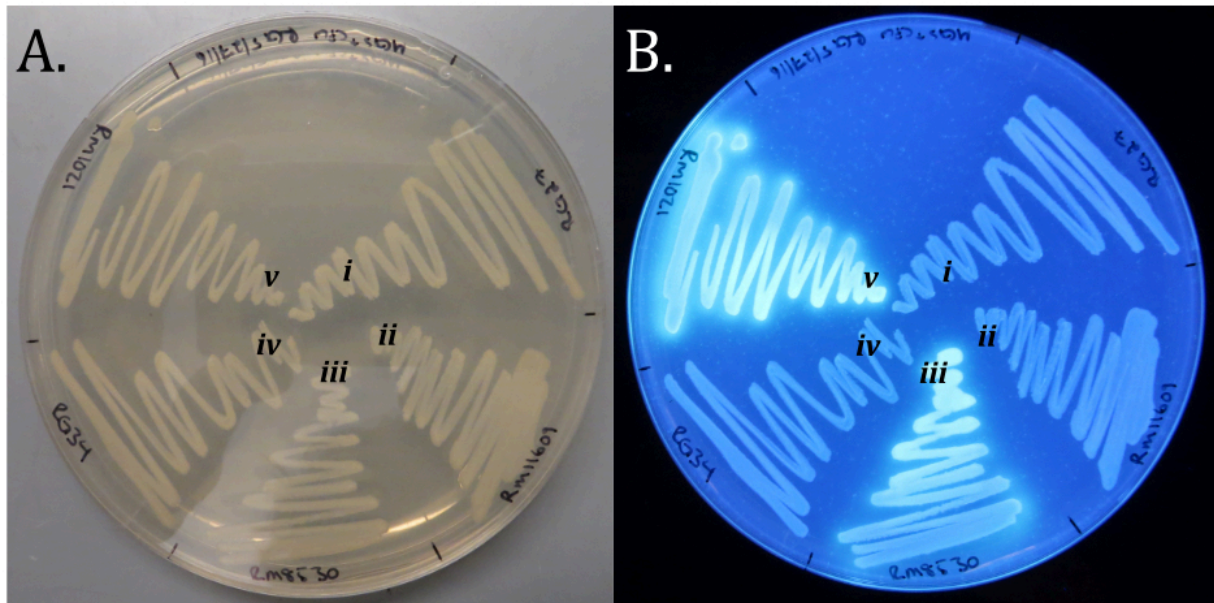

**Supplementary Figure 1.  $\Delta$ exoY mutants lack succinoglycan (EPS I) biosynthesis.** *S. meliloti* strains RG27( $\Delta$ exoY) (i), Rm11609(Rm8530 *exoY*::Tn5-132 *wgaAB*::Tn5) (ii), Rm8530(wt) (iii), RG34( $\Delta$ exoY  $\Delta$ wgaAB) (iv) and Rm1021(EPS II deficient) (v) were grown on MGS medium containing calcofluor white, which fluoresces under UV irradiation in the presence of succinoglycan. Photographs were taken under ambient (A) or long-wave UV transillumination (B). Insertional inactivation (ii) or in-frame deletion of *exoY* (i, iv) resulted in an EPS I deficient phenotype.

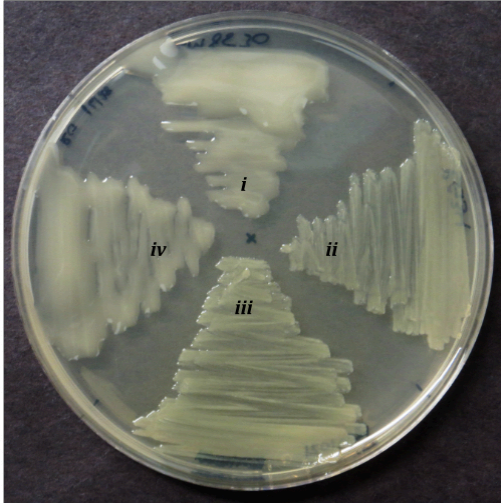

**Supplementary Figure 2. Complementation of  $\Delta wgaAB$  from the *rhaS* locus rescues EPS II biosynthesis.** *S. meliloti* strains Rm8530(wt) (i), RG34( $\Delta exoY \Delta wgaAB$ ) (ii), Rm11609(Rm8530 *exoY::Tn5-132 wgaAB::Tn5*) (iii) and RG35 $\Delta exoY \Delta wgaAB$  *rhaS::pRG73(wgaAB<sup>+</sup>)* (iv) were streaked on TY to observe mucoid phenotypes of each strain. Deletion of *wgaAB* is sufficient to inhibit the production of EPS II (ii). Rescue of EPS II biosynthesis is achieved through complementation of *wgaAB* under their native promoter and RBS by insertion into the *rhaS* (SMc02324) locus (iv).



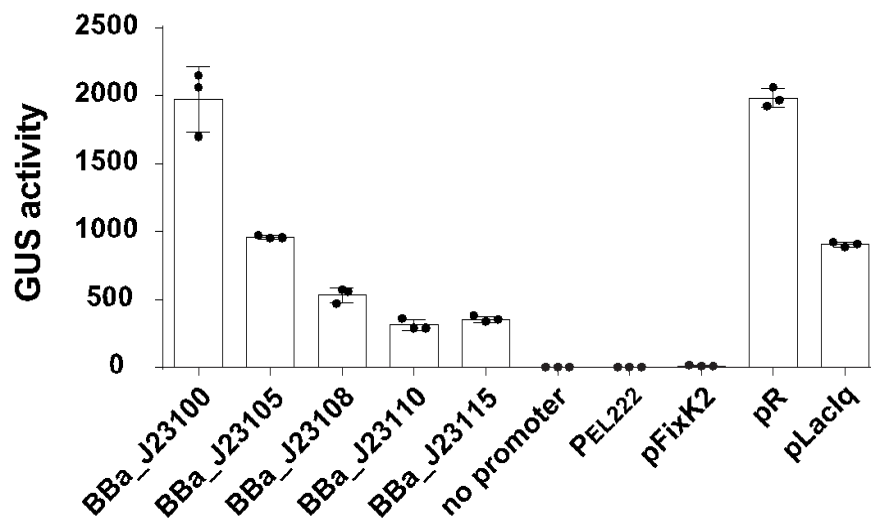

**Supplementary Figure 3. Assessment of promoter strength in *S. meliloti* using a  $\beta$ -glucuronidase (GUS) assay.** *S. meliloti* strain RG34 was transformed with plasmids containing the indicated promoter driving constitutive expression of GUS. Data plotted are mean  $\pm$  standard deviation (n = 3 independent culture preparations).

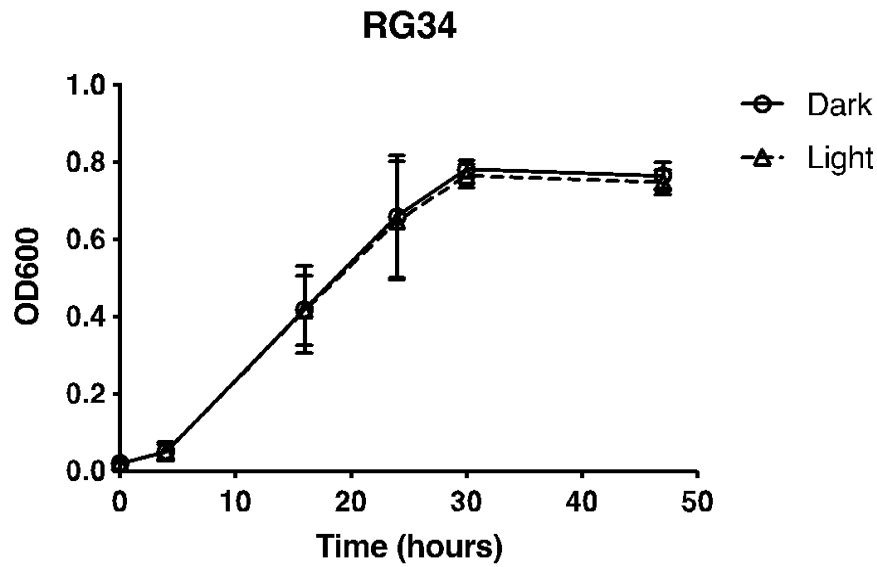

**Supplementary Figure 4. Comparison of *S. meliloti* growth with and without light stimulation.** RG34 transformed with a sfGFP expressing plasmid under Gentamycin selection was grown over 48 hrs under constant blue light illumination (LED 6 W/m<sup>2</sup>). Cell growth quantified by absorbance at 600 nm (OD<sub>600</sub>) showed no difference ( $P = 0.830$ , repeated measures ANOVA,  $F(1,4) = 0.0528$ ). Data plotted are mean  $\pm$  standard deviation ( $n = 3$  independent culture preparations).

## Supplementary Tables

**Supplementary Table 1.** Promoters tested in *S. meliloti*.

| Name of promoter | Sequence                                                                                                                                                                                                                                                                                 | Strength in <i>E. coli</i> | Reference |
|------------------|------------------------------------------------------------------------------------------------------------------------------------------------------------------------------------------------------------------------------------------------------------------------------------------|----------------------------|-----------|
| BBa_J23100       | TTGACGGCTAGCTCAGTCCTAGGTAC<br>AGTGCTAGC                                                                                                                                                                                                                                                  | Strong                     | (9)       |
| BBa_J23105       | GGCTAGCTCAGTCCTAGGTACTATGC<br>TAGC                                                                                                                                                                                                                                                       | Medium                     | (9)       |
| BBa_J23108       | CTGACAGCTAGCTCAGTCCTAGGTAT<br>AATGCTAGC                                                                                                                                                                                                                                                  | Strong/<br>Medium          | (9)       |
| BBa_J23110       | GGCTAGCTCAGTCCTAGGTACAATGC<br>TAGC                                                                                                                                                                                                                                                       | Medium                     | (9)       |
| BBa_J23115       | AGCTAGCTCAGCCCTTGGTACAATGC<br>TAGC                                                                                                                                                                                                                                                       | Weak                       | (9)       |
| FixK2            | CGCCCGTGATCCTGATCACCGGCTA<br>TCCGGACGAAAACATCTCGACCCGG<br>GCCGCCGAGGCCGGCGTAAAAGACG<br>TGGTTTTGAAGCCGCTTCTCGACGAA<br>AACCTGCTCAAGCGTATCCGCCGCG<br>CCATCCAGGACCGGCCTCGGGCATG<br>ACCTACGGGTTCTACGTAAGGCAC<br>CCCCCTTAAGATATCGCTCGAAATTT<br>TCGAACCTCCCGATACCGCGTACCAA<br>GCGTCATCACAACGGAG | Very weak or<br>none       | (9, 10)   |
| pR               | GTGCGTGTTGACTATTTTACCTCTGG<br>CGGTGATAATGGTTGC                                                                                                                                                                                                                                           | Strong                     | (9, 10)   |
| Laclq            | AGCTAGCTCAGCCCTTGGTACAATGC<br>TAGC                                                                                                                                                                                                                                                       | Medium/<br>Weak            | (9-11)    |

|                    |                                                               |                      |      |
|--------------------|---------------------------------------------------------------|----------------------|------|
| P <sub>EL222</sub> | GGTAGCCTTTAGTCCATGTTAGCGAA<br>GAAAATGGTTTGTTATAGTCGAATAA<br>A | Very weak or<br>none | (12) |
|--------------------|---------------------------------------------------------------|----------------------|------|

**Supplementary Table 2.** Plasmid map and primers used in this study.

| Name/Brief Description | Backbone/Reference | Primers Used (GG stands for Golden Gate)                                                                                                                                                                                                                                                                                                                                                         |
|------------------------|--------------------|--------------------------------------------------------------------------------------------------------------------------------------------------------------------------------------------------------------------------------------------------------------------------------------------------------------------------------------------------------------------------------------------------|
| <b>pSEVA531</b>        | (3)                | NA                                                                                                                                                                                                                                                                                                                                                                                               |
| <b>pSEVA631</b>        | (3)                | NA                                                                                                                                                                                                                                                                                                                                                                                               |
| <b>pCAP77</b>          | (2)                | NA                                                                                                                                                                                                                                                                                                                                                                                               |
| <b>pJQ200SK</b>        | (5)                | NA                                                                                                                                                                                                                                                                                                                                                                                               |
| <b>pRG52</b>           | pGEM-T Easy        | <p>Primers for 5' end of <i>exoY</i> (SMb20946)</p> <p><i>exoY_5'_F_XhoI</i>:<br/> <b>CTCGAG</b>GTTGCAGTCGAGCATAATCG</p> <p><i>exoY_5'_R</i>:<br/> <b>GGAGACGTCGTT</b>CGCGGACTTCATAGAGGTGAC</p> <p>Primers for 3' end of <i>exoY</i> (SMb20946)</p> <p><i>exoY_3'_F</i>:<br/> <b>ATGAAGTCCGCGA</b>ACGACGTCTCCTACGCCAC</p> <p><i>exoY_3'_R_BamHI</i>:<br/> <b>GGATCC</b>CATCTTGACGCCGATCTCTTC</p> |
| <b>pRG53</b>           | pJQ200SK and pRG52 | NA                                                                                                                                                                                                                                                                                                                                                                                               |
| <b>pRG68</b>           | pGEM-T Easy        | <p><i>wgaAB_5'_F_SpeI</i>:<br/> <b>ACTAGT</b>GCAGCATGATGTTCTGTA</p> <p><i>wgaAB_5'_R</i>:<br/> <b>CTTCTTGAATAAATCG</b>ATTATCCAGAAGATGA</p>                                                                                                                                                                                                                                                       |

|                                                                        |                           |                                                                                                                                                                                                                                                                                                                                                                                                                                                                                                                                                                  |
|------------------------------------------------------------------------|---------------------------|------------------------------------------------------------------------------------------------------------------------------------------------------------------------------------------------------------------------------------------------------------------------------------------------------------------------------------------------------------------------------------------------------------------------------------------------------------------------------------------------------------------------------------------------------------------|
|                                                                        |                           | <p>wgaAB_3'_F:<br/> <b>AATCGATTTATTCAAGAAGAAGGGTTCGATTG</b></p> <p>wgaAB_3'_R_NotI:<br/> <b>GCGGCCGCCACTGCCACCATCAGGCT</b></p>                                                                                                                                                                                                                                                                                                                                                                                                                                   |
| <b>pRG70</b>                                                           | pJQ200<br>SK and<br>pRG68 | NA                                                                                                                                                                                                                                                                                                                                                                                                                                                                                                                                                               |
| <b>pRG73</b>                                                           | pCAP77                    | <p>wgcA_comp_F:<br/> <b>TCCCCCGGGCTGCAGGCCGACGAAACGGTCAACA</b></p> <p>wgaD_comp_R:<br/> <b>AGGTCGACGGTATCGATAGCAATCGACCCTTCTTCTT</b><br/> GA</p>                                                                                                                                                                                                                                                                                                                                                                                                                 |
| <b>pAP01</b><br><br>Proof of<br>concept<br>( P <sub>EI222</sub> _GFP ) | pSEVA5<br>31              | <p><b>F_GG_P<sub>EI-222</sub>_Spacer_RbsD_Spacer_GFP overlap:</b><br/> <b>GTTTT_GGTCTC T</b> AGCC<br/> <b>GGTAGCCTTTAGTCCATGTTAGCGAAGAAAATGGTTTG</b><br/> <b>TTATAGTCGAATAAA</b> _<br/> CACACAGAATTCATT <b>AAGAAGGAGATAT</b> _GGTACC_<br/> ATGCGTAAAGGCGAAGAG<br/> <b>R_GG_GFP overlap:</b><br/> <b>GGGCT_GGTCTC T</b><br/> GTGT_TCATTTGTACAGTTCATCCATACCATG</p> <p><b>F_GG_backbone overlap:</b><br/> <b>GAAGGG_GGTCTC T</b><br/> ACAC_TGAAGATCTCCAGGCATCA</p> <p><b>R_GG_backbone overlap:</b><br/> <b>GAGACC_GGTCTC T</b><br/> GGCT_CTGTGTGAAATTGTTATCCGC</p> |

|                                                                                    |              |                                                                                                                                                                                                                                                                                                                                                                                                                                                               |
|------------------------------------------------------------------------------------|--------------|---------------------------------------------------------------------------------------------------------------------------------------------------------------------------------------------------------------------------------------------------------------------------------------------------------------------------------------------------------------------------------------------------------------------------------------------------------------|
| <p><b>pAP05</b></p> <p>Proof of concept (P<sub>EI222</sub>_GFP + pJ23105_EI22)</p> | <p>pAP01</p> | <p><b>F_GG_pJ23105_Spacer_Rbs34_Spacer_EI222 overlap:</b><br/> GGTTT_GGTCTC T AGGA<br/> GGCTAGCTCAGTCCTAGGTACTATGCTAGC_CACACAG<br/> AATTCATT_AAAGAGGAGAAA_GGTACC_ATGTTGGATA<br/> TGGGACAAGATC</p> <p><b>R_GG_EL222 overlap:</b><br/> ATTG_GGTCTC T GAAG TCAGATTCCGGCTTCGAC</p> <p><b>F_GG_pAP01 overlap:</b><br/> AAAA_GGTCTC T CTTC_<br/> TATGAAATCTAACAATGCGCTC</p> <p><b>R_GG_pAP01 overlap:</b><br/> GTCCC_GGTCTC T TCCT_<br/> TGATAAACTACCGCATTACAGT</p> |
| <p><b>pAP15</b></p> <p>Proof of concept (P<sub>EI222</sub>_GFP + pJ23115_EI22)</p> | <p>pAP01</p> | <p><b>F_GG_pJ23115_Spacer_Rbs34_Spacer_EI222 overlap:</b><br/> GGTTT_GGTCTC T AGGA<br/> AGCTAGCTCAGCCCTTGGTACAATGCTAGC_CACACAG<br/> AATTCATT_AAAGAGGAGAAA_GGTACC_ATGTTGGATA<br/> TGGGACAAGATC</p> <p><b>R_GG_EL222 overlap:</b><br/> ATTG_GGTCTC T GAAG TCAGATTCCGGCTTCGAC</p> <p><b>F_GG_pAP01 overlap:</b><br/> AAAA_GGTCTC T CTTC_<br/> TATGAAATCTAACAATGCGCTC</p> <p><b>R_GG_pAP01 overlap:</b><br/> GTCCC_GGTCTC T TCCT_<br/> TGATAAACTACCGCATTACAGT</p> |

|                                                                                                                             |                      |                                                                                                                                                                                                                                                                                                                                                                                                                                                                                                              |
|-----------------------------------------------------------------------------------------------------------------------------|----------------------|--------------------------------------------------------------------------------------------------------------------------------------------------------------------------------------------------------------------------------------------------------------------------------------------------------------------------------------------------------------------------------------------------------------------------------------------------------------------------------------------------------------|
| <p><b>pAP00GUS</b><br/><br/>(pJ23100_GUS)<br/><br/>wanted to see strength of promoters in Sino</p>                          | <p>pSEVA5<br/>31</p> | <p><b>F_GG_pJ23100_Spacer_Rbs34_Spacer_GUS overlap:</b><br/> <b>ATCG_GGTCTC T</b><br/> AGGATTGACGGCTAGCTCAGTCCTAGGTACAGTGCTA<br/> <b>GC_CACACAGAATTCATT_AAAGAGGAGAAA_GGTACC</b><br/> _ATGGTCCGTCCTGTAGAAAC</p> <p><b>R_GG_GUS overlap:</b><br/> <b>ATCG_GGTCTC T</b> GAAG GAAGTCATTGTTTGCCTCCCT</p> <p><b>R_GG_pSEVA531 overlap:</b><br/> <b>ATCG_GGTCTC T</b> TCCT_GCGGCCTCCTGTGTG</p> <p><b>F_GG_pSEVA531 overlap:</b><br/> <b>ATCG_GGTCTC T</b> CTCCT_GGATCCTCTAGAGTCGAC</p>                              |
| <p><b>pAPP<sub>EL222</sub>GUS</b><br/><br/>(P<sub>EL222</sub>_GUS)<br/><br/>wanted to see strength of promoters in Sino</p> | <p>pSEVA5<br/>31</p> | <p><b>F_GG_P<sub>EL222</sub>_Spacer_Rbs34_Spacer_GUS overlap:</b><br/> <b>ATCG_GGTCTC T</b> AGGA<br/> GGTAGCCTTTAGTCCATGTTAGCGAAGAAAATGGTTTG<br/> TTATAGTCGAATAAA_CACACAGAATTCATT_AAAGAGG<br/> <b>AGAAA_GGTACC_ATGGTCCGTCCTGTAGAAAC</b></p> <p><b>R_GG_GUS overlap:</b><br/> <b>ATCG_GGTCTC T</b> GAAG GAAGTCATTGTTTGCCTCCCT</p> <p><b>R_GG_pSEVA531 overlap:</b><br/> <b>ATCG_GGTCTC T</b> TCCT_GCGGCCTCCTGTGTG</p> <p><b>F_GG_pSEVA531 overlap:</b><br/> <b>ATCG_GGTCTC T</b> CTCCT_GGATCCTCTAGAGTCGAC</p> |
| <p><b>pAP05GUS</b><br/><br/>(pJ23105_GUS)</p>                                                                               | <p>pSEVA5<br/>31</p> | <p><b>F_GG_pJ23105_Spacer_Rbs34_Spacer_GUS overlap:</b><br/> <b>ATCG_GGTCTC T</b> AGGA<br/> GGCTAGCTCAGTCCTAGGTAATGCTAGC<br/> _CACACAGAATTCATT_AAAGAGGAGAAA_GGTACC_AT<br/> GGTCCGTCCTGTAGAAAC</p>                                                                                                                                                                                                                                                                                                            |



|                                                                                                                      |                 |                                                                                                                                                                                                                                                                                                                                                                                                                                                                                                           |
|----------------------------------------------------------------------------------------------------------------------|-----------------|-----------------------------------------------------------------------------------------------------------------------------------------------------------------------------------------------------------------------------------------------------------------------------------------------------------------------------------------------------------------------------------------------------------------------------------------------------------------------------------------------------------|
| <p>wanted to see strength of promoters in Sino</p>                                                                   |                 | <p><b>R_GG_GUS overlap:</b><br/> <b>ATCG_GGTCTC T</b> GAAG GAAGTCATTGTTTGCCTCCCT</p> <p><b>R_GG_pSEVA531 overlap:</b><br/> <b>ATCG_GGTCTC T</b> TCCT_GCGGCCTCCTGTGTG</p> <p><b>F_GG_pSEVA531 overlap:</b><br/> <b>ATCG_GGTCTC T</b> CTTC_GGGATCCTCTAGAGTCGAC</p>                                                                                                                                                                                                                                          |
| <p><b>pAP08GUS</b><br/><br/>         (pJ23108_GUS)<br/><br/>         wanted to see strength of promoters in Sino</p> | <p>pSEVA531</p> | <p><b>F_GG_pJ23108_Spacer_rbs34_Spacer_GUS overlap:</b><br/> <b>ATCG_GGTCTC T</b> AGGA<br/> <b>CTGACAGCTAGCTCAGTCCTAGGTATAATGCTAGC</b><br/>         _CACACAGAATTCATT_ <b>AAAGAGGAGAAA</b> _GGTACC_AT<br/>         GGTCCGTCCTGTAGAAAC</p> <p><b>R_GG_GUS overlap:</b><br/> <b>ATCG_GGTCTC T</b> GAAG GAAGTCATTGTTTGCCTCCCT</p> <p><b>R_GG_pSEVA531 overlap:</b><br/> <b>ATCG_GGTCTC T</b> TCCT_GCGGCCTCCTGTGTG</p> <p><b>F_GG_pSEVA531 overlap:</b><br/> <b>ATCG_GGTCTC T</b> CTTC_GGGATCCTCTAGAGTCGAC</p> |
| <p><b>pAP10GUS</b><br/><br/>         (pJ23110_GUS)<br/><br/>         wanted to see strength of promoters in Sino</p> | <p>pSEVA531</p> | <p><b>F_GG_pJ23110_Spacer_rbs34_Spacer_GUS overlap:</b><br/> <b>ATCG_GGTCTC T</b> AGGA<br/> <b>GGCTAGCTCAGTCCTAGGTACAATGCTAGC</b><br/>         _CACACAGAATTCATT_ <b>AAAGAGGAGAAA</b> _GGTACC_AT<br/>         GGTCCGTCCTGTAGAAAC</p> <p><b>R_GG_GUS overlap:</b><br/> <b>ATCG_GGTCTC T</b> GAAG GAAGTCATTGTTTGCCTCCCT</p> <p><b>R_GG_pSEVA531 overlap:</b><br/> <b>ATCG_GGTCTC T</b> TCCT_GCGGCCTCCTGTGTG</p> <p><b>F_GG_pSEVA531 overlap:</b></p>                                                         |

|                                                                                                          |          |                                                                                                                                                                                                                                                                                                                                                                                                                                                                 |
|----------------------------------------------------------------------------------------------------------|----------|-----------------------------------------------------------------------------------------------------------------------------------------------------------------------------------------------------------------------------------------------------------------------------------------------------------------------------------------------------------------------------------------------------------------------------------------------------------------|
|                                                                                                          |          | <b>ATCG_GGTCTC T</b> CTCG_GGGATCCTCTAGAGTCGAC                                                                                                                                                                                                                                                                                                                                                                                                                   |
| <b>pAP15GUS</b><br><br>(pJ23115_GUS)<br><br>wanted to see strength of promoters in Sino                  | pSEVA531 | <b>F_GG_pJ23115_Spacer_rbs34_Spacer_GUS overlap:</b><br><b>ATCG_GGTCTC T</b> AGGA<br><b>AGCTAGCTCAGCCCTTGGTACAATGCTAGC</b><br>_CACACAGAATTCATT_ <b>AAAGAGGAGAAA</b> _GGTACC_AT<br>GGTCCGTCCTGTAGAAAC<br><br><b>R_GG_GUS overlap:</b><br><b>ATCG_GGTCTC T</b> GAAG GAAGTCATTGTTTGCCTCCCT<br><br><b>R_GG_pSEVA531 overlap:</b><br><b>ATCG_GGTCTC T</b> TCCT_GCGGCCTCCTGTGTG<br><br><b>F_GG_pSEVA531 overlap:</b><br><b>ATCG_GGTCTC T</b> CTCG_GGGATCCTCTAGAGTCGAC |
| <b>pAPFixK2GUS</b><br><br>(pFixK2_GUS)<br><br>wanted to see strength of promoters in Sino and cross talk | pAP15GUS | <b>F_GG_pFixK2 overlap:</b><br><b>ATCG_GGTCTC T</b> AGGA_CGCCCCTGATCCTGA<br><br><b>R_GG_pFixK2 overlap:</b><br><b>GTTT_GGTCTC T</b> TGTG_CTCCGTTGTGATGACGCA<br><br><b>R_GG_pSEVA531 overlap:</b><br><b>ATCG_GGTCTC T</b> TCCT_GCGGCCTCCTGTGTG<br><br><b>F_GG_pAP15GUS overlap:</b><br><b>GCCA_GGTCTC T</b> CACA_CAGAATTCATTAAGAGGAG                                                                                                                             |
| <b>pAPlacIqGUS</b>                                                                                       | pSEVA531 | <b>F_GG_pIacIq_Spacer_rbs34_Spacer_GUS overlap:</b><br><b>ATCG_GGTCTC T</b> AGGA<br><b>_AGCTAGCTCAGCCCTTGGTACAATGCTAGC</b>                                                                                                                                                                                                                                                                                                                                      |

|                                                                                                      |                      |                                                                                                                                                                                                                                                                                                                                                                                                                                         |
|------------------------------------------------------------------------------------------------------|----------------------|-----------------------------------------------------------------------------------------------------------------------------------------------------------------------------------------------------------------------------------------------------------------------------------------------------------------------------------------------------------------------------------------------------------------------------------------|
| <p>(placI<sub>q</sub>_GUS)</p> <p>wanted to see strength of promoters in Sino and cross talk</p>     |                      | <p>_CACACAGAATTCATT_AAAGAGGAGAAA_GGTACC_AT<br/>GGTCCGTCCTGTAGAAAC</p> <p><b>R_GG_GUS overlap:</b><br/>ATCG_GGTCTC T GAAG GAAGTCATTGTTTGCCTCCCT</p> <p><b>R_GG_pSEVA531 overlap:</b><br/>ATCG_GGTCTC T TCCT_GCGGCCTCCTGTGTG</p> <p><b>F_GG_pSEVA531 overlap:</b><br/>ATCG_GGTCTC T CTTC_GGGATCCTCTAGAGTCGAC</p>                                                                                                                          |
| <p><b>pAPRGUS</b><br/>(pR_GUS)</p> <p>wanted to see strength of promoters in Sino and cross talk</p> | <p>pSEVA5<br/>31</p> | <p><b>F_GG_pR_Spacer_rbs34_Spacer_GUS overlap:</b><br/>ATCG_GGTCTC T AGGA<br/>GTGCGTGTGACTATTTTACCTCTGGCGGTGATAATGG<br/>TTGC_CACACAGAATTCATT_AAAGAGGAGAAA_GGTA<br/>CC_ATGGTCCGTCCTGTAGAAAC</p> <p><b>R_GG_GUS overlap:</b><br/>ATCG_GGTCTC T GAAG GAAGTCATTGTTTGCCTCCCT</p> <p><b>R_GG_pSEVA531 overlap:</b><br/>ATCG_GGTCTC T TCCT_GCGGCCTCCTGTGTG</p> <p><b>F_GG_pSEVA531 overlap:</b><br/>ATCG_GGTCTC T CTTC_GGGATCCTCTAGAGTCGAC</p> |
| <p><b>pAP11</b><br/>(pR_wgaAB)</p> <p>wanted to express <i>wgaAB</i> constitutively</p>              | <p>pSEVA5<br/>31</p> | <p><b>F_GG_pR_Spacer_rbs34_Spacer_wgaAB overlap</b><br/>AAAT_GGTCTC T<br/>AGGA_GTGCGTGTGACTATTTTACCTCTGGCGGTGAT<br/>AATGGTTGC_CACACAGAATTCATT_AAAGAGGAGAAA<br/>GGTACC_GTGCAAGAGTTGATGCTCTTAAC</p> <p><b>R_GG_wgaB overlap</b><br/>GCTT_GGTCTC T GAAG_TTCTTGAAACCGGCGG</p>                                                                                                                                                               |

|                                                                                                                                                                                                       |                               |                                                                                                                                                                                                                                                                                                                                                                                                                                                                                                                        |
|-------------------------------------------------------------------------------------------------------------------------------------------------------------------------------------------------------|-------------------------------|------------------------------------------------------------------------------------------------------------------------------------------------------------------------------------------------------------------------------------------------------------------------------------------------------------------------------------------------------------------------------------------------------------------------------------------------------------------------------------------------------------------------|
|                                                                                                                                                                                                       |                               | <p><b>F_GG_pSEVA531 overlap</b><br/> <b>ATCG_GGTCTC T</b> CTTC_GGGATCCTCTAGAGTCGAC</p> <p><b>R_GG_pSEVA531 overlap</b><br/> <b>ATCG_GGTCTC T</b> TCCT_GCGGCCTCCTGTGTG</p>                                                                                                                                                                                                                                                                                                                                              |
| <p><b>pAP11G</b><br/>         (pR_GFP)</p> <p>wanted to<br/>         constitutively<br/>         express GFP</p>                                                                                      | <p>pSEVA6<br/>         31</p> | <p><b>F_GG_pR_Spacer_rbs34_Saper_GFP overlap</b><br/> <b>AAAT_GGTCTC T</b><br/>         AGGA_GTGCGTGTGACTATTTTACCTCTGGCGGTGAT<br/> <b>AATGGTTGC_CACACAGAATTCATT_AAAGAGGAGAAA</b><br/>         _GGTACC_ <b>ATCG</b>TAAGGCGAAGAGCTG</p> <p><b>R_GG_GFP overlap</b><br/> <b>ATCG_GGTCTC T</b><br/>         GAAG_TCATTTGTACAGTTCATCCATACCATG</p> <p><b>F_GG_pSEVA631 overlap</b><br/> <b>ATCG_GGTCTC T</b> CTTC_GGGATCCTCTAGAGTCGAC</p> <p><b>R_GG_pSEVA631 overlap</b><br/> <b>ATCG_GGTCTC T</b> TCCT_GCGGCCTCCTGTGTG</p> |
| <p><b>pAP14</b><br/>         (P<sub>Ei222</sub>_wgaAB<br/>         +<br/>         pJ23105_Ei2<br/>         22)</p> <p>wgaAB<br/>         expression<br/>         controlled by<br/>         light</p> | <p>pAP05</p>                  | <p><b>R_GG_wgaB overlap:</b><br/> <b>GCTT_GGTCTC T</b> GTGT_TTCTTGAAACCGGCGG</p> <p><b>F_GG_P<sub>Ei222</sub>_Spacer_rbs34_Spacer_wgaA overlap:</b><br/> <b>AAAT_GGTCTC T</b> AGGA_<br/> <b>GGTAGCCTTTAGTCCATGTTAGCGAAGAAAATGTTTTG</b><br/> <b>TTATAGTCGAATAAA</b><br/>         _CACACAGAATTCATT_ <b>AAAGAGGAGAAA</b>_GGTACC_<br/>         ATGTCTTCTAACGTGAGGCAG</p>                                                                                                                                                   |

|            |              |                                                                                                                                                                                                                                                                                                                                                                                                                                                                                                                          |
|------------|--------------|--------------------------------------------------------------------------------------------------------------------------------------------------------------------------------------------------------------------------------------------------------------------------------------------------------------------------------------------------------------------------------------------------------------------------------------------------------------------------------------------------------------------------|
|            |              | <p><b>F_GG_pAP05 overlap:</b></p> <p><b>ATCG_GGTCTC T</b> ACAC_GCCATCGTCCACATATCCAC</p> <p><b>R_GG_pAP05 overlap:</b></p> <p><b>ATCG_GGTCTC T</b> TCCT_CTGGCTCGCTTCGCTC</p>                                                                                                                                                                                                                                                                                                                                              |
| pAP05L     | pAP05        | <p><b>F_GG placlq_Spacer_rbs34_Spacer_EL222 overlap:</b></p> <p><b>ATCG_GGTCTC T</b> AGGA</p> <p><b>AGCTAGCTCAGCCCTTGGTACAATGCTAGC</b></p> <p>_CACACAGAATTCATT_ <b>AAAGAGGAGAAA</b> GGTACC_</p> <p>ATGTTGGATATGGGACAAGATC</p> <p><b>R_GG_EL222 overlap:</b></p> <p><b>ATTT_GGTCTC T</b> GAAG TCAGATTCCGGCTTCGAC</p> <p><b>F_GG_pAP05 overlap:</b></p> <p><b>AAAA_GGTCTC T</b> CTTC_</p> <p>TATGAAATCTAACAATGCGCTC</p> <p><b>R_GG_pAP05 overlap:</b></p> <p><b>GTCCC_GGTCTC T</b> TCCT_</p> <p>TGATAAACTACCGCATTACAGT</p> |
| pAP05EL222 | pSEVA5<br>31 | <p><b>F_GG pJ23105_Spacer_Rbs34_Spacer_EL222 overlap:</b></p> <p><b>ATCG_GGTCTC T</b> AGGA</p>                                                                                                                                                                                                                                                                                                                                                                                                                           |

|                                                                                                                                                                   |               |                                                                                                                                                                                                                                                                                                                                                                                                     |
|-------------------------------------------------------------------------------------------------------------------------------------------------------------------|---------------|-----------------------------------------------------------------------------------------------------------------------------------------------------------------------------------------------------------------------------------------------------------------------------------------------------------------------------------------------------------------------------------------------------|
|                                                                                                                                                                   |               | <p><b>GGCTAGCTCAGTCCTAGGTA</b>CTATGCTAGC</p> <p>_CACACAGAATTCATT_ <b>AAAGAGGAGAAA</b>_GGTACC_</p> <p>ATGTTGGATATGGGACAAGATC</p> <p><b>R_GG_EL222</b> overlap:</p> <p><b>ATTT_GGTCTC T</b> GAAG TCAGATTCCGGCTTCGAC</p> <p><b>R_GG_PSEVA531</b> overlap</p> <p><b>ATCG_GGTCTC T</b> TCCT_GCGGCCTCCTGTGTG</p> <p><b>F_GG_pSEVA531</b> overlap</p> <p><b>ATCG_GGTCTC</b> T CTTC_GGGATCCTCTAGAGTCGAC</p> |
| <p><b>pAP33</b><br/>(P<sub>EI222</sub>_wgaAB<br/>+<br/>placIq<sub>EI222</sub>)<br/>optimize<br/>wgaAB<br/>expression by<br/>light/different<br/>rbs for wgaAB</p> | <p>pAP05L</p> | <p><b>F_NotI_pAP05L</b> overlap:</p> <p><b>ATCA_GCGGCCGC</b>GTCGTG</p> <p><b>R_XbaI_rbsD_pAP05L</b> overlap:</p> <p><b>ATCA TCTAGA</b> <b>ATGTATATCTCCTTCTT</b>_AAACGTTCG<br/>CTAGTACCTTTATTTCG</p> <p><b>F_XbaI_ATG_wgaA</b> overlap:</p> <p><b>GAAA TCTAGA</b> <b>ATG</b>_TCTTCTAACGTGAGGCAG</p> <p><b>R_NotI_wgaB</b> overlap:</p> <p><b>AGAC_GCGGCCGC</b>_TTCTTGAACCGGCGGGG</p>                 |

|                                                                                                                                                                  |               |                                                                                                                                                                                                                                                                                                                                                |
|------------------------------------------------------------------------------------------------------------------------------------------------------------------|---------------|------------------------------------------------------------------------------------------------------------------------------------------------------------------------------------------------------------------------------------------------------------------------------------------------------------------------------------------------|
|                                                                                                                                                                  |               |                                                                                                                                                                                                                                                                                                                                                |
| <p><b>pAP34</b><br/> (P<sub>EI222</sub>_wgaAB<br/> +<br/> placIq_EI222)<br/> optimize<br/> wgaAB<br/> expression by<br/> light/ different<br/> rbs for wgaAB</p> | <p>pAP05L</p> | <p><b>F_NotI_pAP05L overlap:</b></p> <p>ATCA_GCGGCCGC<sub>1</sub>GTCGTG</p> <p><b>R_XbaI_rbs33_pAP05L overlap:</b></p> <p>ATCA_TCTAGA_GTCCTGTGTGA_</p> <p>AAACGTTTCGCTAGTACCTT</p> <p><b>F_XbaI_ATG_wgaA overlap:</b></p> <p>GAAA_TCTAGA_ATG_TCTTCTAACGTGAGGCAG</p> <p><b>R_NotI_wgaB overlap:</b></p> <p>AGAC_GCGGCCGC_TTCTTCAAACCGGCGGGG</p> |
| <p><b>pAP35</b><br/> (P<sub>EI222</sub>_wgaAB<br/> +<br/> placIq_EI222)<br/> optimize<br/> wgaAB<br/> expression by<br/> light/ different<br/> rbs for wgaAB</p> | <p>pAP05L</p> | <p><b>F_NotI_pAP05L overlap:</b></p> <p>ATCA_GCGGCCGC<sub>1</sub>GTCGTG</p> <p><b>R_XbaI_rbs31_pAP05L overlap:</b></p> <p>ATCA_TCTAGA_GGTTTCCTGTGTGA_</p> <p>AAACGTTTCGCTAGTACCTT</p> <p><b>F_XbaI_ATG_wgaA overlap:</b></p> <p>GAAA_TCTAGA_ATG_TCTTCTAACGTGAGGCAG</p>                                                                         |

|                                                                                                                                                                       |        |                                                                                                                                                                                                                                                                                                                                              |
|-----------------------------------------------------------------------------------------------------------------------------------------------------------------------|--------|----------------------------------------------------------------------------------------------------------------------------------------------------------------------------------------------------------------------------------------------------------------------------------------------------------------------------------------------|
|                                                                                                                                                                       |        | <p><b>R_NotI_wgaB overlap:</b></p> <p>AGAC_GCGGCCGC_TTCTTGAAACCGGCGGGG</p>                                                                                                                                                                                                                                                                   |
| <p><b>pAP36</b><br/>(P<sub>EI222</sub>_wgaAB<br/>+<br/>placIq_EI222)<br/>optimize<br/>wgaAB<br/>expression by<br/>light/alternative<br/>start codon<br/>for wgaAB</p> | pAP05L | <p><b>F_NotI_pAP05L overlap:</b></p> <p>ATCA_GCGGCCGC_GTCGTG</p> <p><b>R_XbaI_rbsD_pAP05L overlap:</b></p> <p>ATCA_TCTAGA_ATGTATATCTCCTTCTT_AAACGTTCTG<br/>CTAGTACCTTTATTCTG</p> <p><b>F_XbaI_GTG_wgaA overlap:</b></p> <p>GAAA_TCTAGA_GTG_TCTTCTAACGTGAGGCAG</p> <p><b>R_NotI_wgaB overlap:</b></p> <p>AGAC_GCGGCCGC_TTCTTGAAACCGGCGGGG</p> |
| <p><b>pAP37</b><br/>(P<sub>EI222</sub>_wgaAB<br/>+<br/>placIq_EI222)<br/>optimize<br/>wgaAB<br/>expression by<br/>light/alternative<br/>start codon<br/>for wgaAB</p> | pAP05L | <p><b>F_NotI_pAP05L overlap:</b></p> <p>ATCA_GCGGCCGC_GTCGTG</p> <p><b>R_XbaI_rbs33_pAP05L overlap:</b></p> <p>ATCA_TCTAGA_GTCCTGTGTGA_<br/>AAACGTTCTGCTAGTACCTT</p> <p><b>F_XbaI_GTG_wgaA overlap:</b></p> <p>GAAA_TCTAGA_GTG_TCTTCTAACGTGAGGCAG</p>                                                                                        |



|                                                                                                                                                                            |        |                                                                                                                                                                                                                                                                                                                                 |
|----------------------------------------------------------------------------------------------------------------------------------------------------------------------------|--------|---------------------------------------------------------------------------------------------------------------------------------------------------------------------------------------------------------------------------------------------------------------------------------------------------------------------------------|
|                                                                                                                                                                            |        | <p><b>R_NotI_wgaB overlap:</b></p> <p>AGAC_GCGGCCGC_TTCTTGAAACCGGCGGGG</p>                                                                                                                                                                                                                                                      |
| <p><b>pAP38</b><br/>(P<sub>EI222</sub>_wgaAB<br/>+<br/>placIq_EI222)<br/>optimize<br/>wgaAB<br/>expression by<br/>light/<br/>alternative<br/>start codon<br/>for wgaAB</p> | pAP05L | <p><b>F_NotI_pAP05L overlap:</b></p> <p>ATCA_GCGGCCGCGTCGTG</p> <p><b>R_XbaI_rbs31_pAP05L overlap:</b></p> <p>ATCA_TCTAGA_GGTTTCCTGTGTGA_<br/>AAACGTTCTAGTACCTT</p> <p><b>F_XbaI_GTG_wgaA overlap:</b></p> <p>GAAA_TCTAGA_GTG_TCTTCTAACGTGAGGCAG</p> <p><b>R_NotI_wgaB overlap:</b></p> <p>AGAC_GCGGCCGC_TTCTTGAAACCGGCGGGG</p> |

**Supplementary Table 3.** *Sinorhizobium meliloti* strains searched for LOV domain containing proteins.

| <i>S. meliloti</i> strain                        |
|--------------------------------------------------|
| <i>Sinorhizobium meliloti</i> 1021               |
| <i>Sinorhizobium meliloti</i> 2011               |
| <i>Sinorhizobium meliloti</i> AK83               |
| <i>Sinorhizobium meliloti</i> B399               |
| <i>Sinorhizobium meliloti</i> B401               |
| <i>Sinorhizobium meliloti</i> BL225C             |
| <i>Sinorhizobium meliloti</i> CCMM B554 (FSM-MA) |
| <i>Sinorhizobium meliloti</i> GR4                |
| <i>Sinorhizobium meliloti</i> HM006              |
| <i>Sinorhizobium meliloti</i> KH35c              |
| <i>Sinorhizobium meliloti</i> KH46               |
| <i>Sinorhizobium meliloti</i> M162               |
| <i>Sinorhizobium meliloti</i> M270               |
| <i>Sinorhizobium meliloti</i> Rm41               |
| <i>Sinorhizobium meliloti</i> RU11/001           |
| <i>Sinorhizobium meliloti</i> SM11               |
| <i>Sinorhizobium meliloti</i> T073               |
| <i>Sinorhizobium meliloti</i> USDA1021           |
| <i>Sinorhizobium meliloti</i> USDA1106           |
| <i>Sinorhizobium meliloti</i> USDA1157           |

Supplementary text related to **Supp. Table 3.**

We searched the proteome of the *Sinorhizobium meliloti* species available at BioCyc Database Collection (biocyc.org), as of 01.05.2020, for potential LOV domain containing proteins (**Supp. Table 3**). Briefly, proteome, open reading frames, of the *S. meliloti* species was scanned for the conserved Asp-Cys-Arg (NCR) tripeptide sequence of LOV domains by using a BLAST search

(blast.ncbi.nlm.nih.gov) (13). Subsequently, candidate proteins containing NCR sequence were manually checked for **GXNCRYMQG** (where X = H, Q or K and Y = N, F or L) amino acid sequence (13). Confirming previous reports, we couldn't find LOV domain containing proteins in *S. meliloti* proteome (14). Not only the LOV domain, but also red-light sensing phytochromes (phy) and blue light sensor BLUF (blue-light sensing using flavin) domains seem to have not evolved in *S. meliloti* (14). However, we cannot exclude the possibility that currently uncharacterized light sensing mechanisms might be present in *S. meliloti* (15).

## References

1. J. Glazebrook, G. C. Walker, A novel exopolysaccharide can function in place of the calcofluor-binding exopolysaccharide in nodulation of alfalfa by *Rhizobium meliloti*. *Cell* **56**, 661-672 (1989).
2. G. D. Arango Pinedo C, Plasmids that insert into the rhamnose utilization locus, rha: a versatile tool for genetic studies in *Sinorhizobium meliloti*. *J Mol Microbiol Biotechnol* (2009).
3. R. Silva-Rocha *et al.*, The Standard European Vector Architecture (SEVA): a coherent platform for the analysis and deployment of complex prokaryotic phenotypes. *Nucleic Acids Res* **41**, D666-675 (2013).
4. P. L. Heckman KL, Gene splicing and mutagenesis by PCR-driven overlap extension. . *Nat Protoc* (2007).
5. H. M. Quandt J, Versatile suicide vectors which allow direct selection for gene replacement in gram-negative bacteria. *Gene*
6. L. S. Martin MO, Generalized transduction in *Rhizobium meliloti*. *Journal of Bacteriology* (1984).
7. L. S. Meade HM, Ruvkun GB, Brown SE, Physical and genetic characterization of symbiotic and auxotrophic mutants of *Rhizobium meliloti* induced by transposon Tn5 mutagenesis. *Journal of Bacteriology* (1982).
8. G. J. Mueller K, Complex regulation of symbiotic functions is coordinated by MucR and quorum sensing in *Sinorhizobium meliloti*. . *Journal of Bacteriology* (2011).
9. J. Anderson (2006) Registry of Standard Biological Parts.
10. R. Ohlendorf, R. R. Vidavski, A. Eldar, K. Moffat, A. Moglich, From dusk till dawn: one-plasmid systems for light-regulated gene expression. *J Mol Biol* **416**, 534-542 (2012).
11. M. P. Calos, DNA sequence for a low-level promoter of the *lac* repressor gene and an 'up' promoter mutations *Nature* **274**, 762-765 (1978).
12. P. Jayaraman *et al.*, Blue light-mediated transcriptional activation and repression of gene expression in bacteria. *Nucleic Acids Res* **44**, 6994-7005 (2016).
13. H. R. Bonomi *et al.*, Light regulates attachment, exopolysaccharide production, and nodulation in *Rhizobium leguminosarum* through a LOV-histidine kinase photoreceptor. *Proc Natl Acad Sci U S A* **109**, 12135-12140 (2012).
14. A. Losi, W. Gartner, Bacterial bilin- and flavin-binding photoreceptors. *Photochem Photobiol Sci* **7**, 1168-1178 (2008).
15. M. A. van der Horst, J. Key, K. J. Hellingwerf, Photosensing in chemotrophic, non-phototrophic bacteria: let there be light sensing too. *Trends Microbiol* **15**, 554-562 (2007).
